1            ***Modulation of spatial cue processing across the lifespan: a***  
2            ***geometric polarization of space restores allocentric navigation***  
3            ***strategies in children and older adults***

4

5    Marcia Bécu<sup>1\*</sup>, Denis Sheynikhovich<sup>1</sup>, Stephen Ramanoël<sup>1</sup>, Guillaume Tatur<sup>1</sup>, Anthony Ozier-  
6    Lafontaine<sup>1</sup>, José-Alain Sahel<sup>1</sup>, Angelo Arleo<sup>1\*</sup>

7    <sup>1</sup>Sorbonne Université, INSERM, CNRS, Institut de la Vision, 17 rue Moreau, F-75012 Paris, France

8    \* corresponding author

9    Contact information:

10    email: [marcia.becu@inserm.fr](mailto:marcia.becu@inserm.fr)

11    postal address: 17, rue Moreau, 75012, Paris, France

12

13 **Abstract**

14       The impact of development and healthy aging on spatial cognition has been traditionally  
15 attributed to a difficulty in using allocentric strategies and a preference for egocentric ones. An  
16 alternative possibility, suggested by our previous works, is that this preference is actually  
17 conditioned by the spatial cues (e.g. geometric or landmark cues) present in the environment rather  
18 than a strategic choice per se. We tested this prediction by having 79 subjects (children, young and  
19 older adults) navigating a Y-maze composed either of landmarks or geometric cues, with an  
20 immersive head-mounted display that allows us to record both head and eye movements. Our  
21 results show that when the performance is based on landmarks solely, children and older adults  
22 exhibit a deficit in using allocentric strategies when compared to young adults. Hence, an inverted U-  
23 profile of allocentric strategies was observed across the lifespan. This was not due to a default of  
24 attention to the landmarks, as evidenced by analysis of gaze dynamics. When geometric cues were  
25 provided, however, older adults and children used allocentric strategies in the same proportion as  
26 young adults. They were, in addition, as efficient and quick to implement the strategy. We thus  
27 propose a reinterpretation of the previous data in the literature, whereby reference to geometric  
28 cues is the default mode for spatial representations, which is immune to age, whereas spatial  
29 representations fail to be anchored on landmarks early in development and later in aging. This new  
30 interpretation has the potential to reunify several data from the literature, ranging from spatial cues  
31 processing to strategy preference, and including other spatial skills like path integration and route  
32 learning.

33

34 Spatial information about location can be represented according to two reference frames. In an  
35 egocentric frame of reference, locations are represented relative to the subject's body, whereas in  
36 an allocentric frame of reference, locations are represented relative to external environmental  
37 elements<sup>1</sup>. The use of allocentric and egocentric strategies is highly influenced by specific situations  
38 the navigator is facing<sup>2</sup> but also by the navigator's individual characteristics. Among the later, age  
39 critically influence the way people navigate in space<sup>3</sup>.

40 Developmental and aging data seem to suggest an inverted U-profile of allocentric processing  
41 with age. In young children, spatial navigation seems to be preferentially guided by egocentric  
42 representations, although some form of allocentric coding can be present early in development<sup>4,5</sup>.  
43 For instance, by having children aged between 5 and 10 navigating a multiple-armed maze  
44 surrounded by distal landmarks, Bullens et al. (2010) showed that a majority of children used an  
45 sequential egocentric strategy spontaneously<sup>6</sup>. The use of allocentric strategies emerged gradually  
46 later on during development, from 7 to 10 years of age. At the other end of the curve, converging  
47 evidence supports a decreased use of allocentric strategies (and a preference for egocentric ones) in  
48 older subjects, when compared to young ones<sup>7-12</sup>. For instance, Rodgers et al. (2012) used a  
49 paradigm allowing to dissociate allocentric and egocentric strategies in a 3-armed maze (so-called Y-  
50 maze)<sup>12</sup>. After having learned to position of a goal starting from one arm of the maze, the subject  
51 was positioned in the second arm of the maze and asked to return to the goal position. The subject's  
52 strategy was classified as egocentric if the subject made the same turn as during the learning phase  
53 and allocentric if he or she moved to the correct goal location. Results showed that older adults were  
54 more likely in this situation to use an egocentric strategy, in comparison to young adults. These age-  
55 related shifts in strategy use have been interpreted in relation to the slow maturation (in  
56 development) and early deterioration (in aging) of the brain areas involved in spatial navigation (e.g.  
57 the hippocampus or frontal areas<sup>13-17</sup>).

58 An alternative hypothesis has been proposed recently. In a study in ecological conditions, Bécu et  
59 al. (2019) showed that healthy aging was associated with an increased preference for geometric  
60 spatial cues<sup>18</sup>. Whereas young adults relied on landmark cues, older adults preferentially used  
61 geometric cues to reorient in space, at the detriment of the landmarks. This preference for geometry  
62 has been linked in older adults to a difficulty in either take perspective or code locations relative to  
63 landmarks. These results potentially challenge the classical view for a specific deficit of allocentric  
64 strategy in aging, given that standard paradigms that tested navigational strategies are exclusively  
65 dependent on the capacity of the subjects to use distal landmarks<sup>8-12</sup>. Furthermore, geometric cues  
66 in these paradigms were always unpolarized and could thus not be used for orientation. It is thus  
67 possible that age-related navigation difficulties, previously explained by a specific deficit of

68 allocentric strategies, are actually linked to a difficulty in processing landmarks. If this interpretation  
69 is true, providing geometric information could potentiate the use of allocentric strategies both in  
70 older adults and children, in which a preference<sup>19</sup> for geometric cues has also been shown<sup>19</sup>.

## 71 **Results**

72 To test this hypothesis, we adapted the Y-maze paradigm by introducing a geometric polarization  
73 to the maze to test the strategy use in a sample of seventy-nine subjects (29 children, 22 young  
74 adults and 28 older adults). We used an immersive virtual reality head-mounted display in order for  
75 the participant to experience proprioceptive and vestibular inputs while navigating freely in the  
76 virtual environment. By recording eye movements while the subject navigated, we sought to unveil  
77 potential gaze-related processes that could explain age-related difficulty in using landmarks and to  
78 get a deeper insight into the nature of the processes involved during spatial navigation. The  
79 participants of this study were randomly assigned to the landmark or the geometry versions. In the  
80 landmark version (fig. 1a), the maze had equiangular arms separated by 120° and it was surrounded  
81 by three distal landmarks. In the geometry version (fig. 1b), two arms were closer to each other (50°),  
82 thus providing a geometric polarization to the maze. The two versions had an equivalent level of  
83 difficulty, given that basic measures of spatial learning between the two versions were equivalent in  
84 young adults (see supp. results 1 and supp. fig. 1). During the “learning phase”, the subjects had to  
85 learn to position of an invisible goal that triggered a rewarding sound (dashed area on fig. 1ab),  
86 starting from the same position (position A on fig. 1ab). After having reached the goal position  
87 directly for 4 consecutive trials, the “testing phase” started. It consisted of six trials in which the  
88 starting position was changed, unknown to the subject, in a pseudo-random manner: three “probe  
89 trials” started from B, three “control trials” started from A (see Methods and supp. fig. 2 for a view  
90 experienced by the subjects in each version). The probe trials allowed us to test the reliance on  
91 external environmental information to code for the goal position. Indeed, if the subject used the  
92 distal landmarks (in the landmark version) or the geometric polarization (in the geometry version) to  
93 navigate to the actual goal position (C), he/she be using an allocentric strategy for that particular  
94 probe trial.

95 Figure 2 shows the proportion of time participants choose an allocentric strategy on the three  
96 probe trials. There was some intra-subject variability in the choices made, with subjects either  
97 choosing the allocentric option always or only on some of the trials. In the landmark version, we  
98 observed an inverted U-profile of allocentric strategy use related to age, with children and older  
99 adults being significantly less likely to use an allocentric strategy in this version, relative to young  
100 adults (Fisher’s exact probability test in children:  $p < 0.01$ ,  $\phi = 0.56$ , oddsratio: 18; in older adults:



101  $p < 0.01$ ,  $\phi = 0.53$ , oddsratio: 16.5). In the geometry version, there was no age difference in the  
102 observed proportion of allocentric choices (children:  $p = 0.28$ ,  $\phi = 0.27$ ; older adults:  $p = 0.22$ ,  $\phi = 0.32$ ,  
103 compared to young adults), with a majority of subjects in each age group using an allocentric  
104 strategy (see also supp. fig. 3). Together, these data support the fact that the traditional observation,  
105 whereby older adults and children exhibit a specific deficit in the use of allocentric strategies, to the  
106 benefit of egocentric ones, was actually erroneous. Indeed, when geometric cues are provided by the  
107 environment, children and older adults are just as efficient as young adults to use flexible and more  
108 complex allocentric strategies. These results suggest that the impairment previously observed across  
109 the lifespan is rather linked to a specific deficit in using landmarks to represent spatial locations.

110 We next wanted to compare how people explored and learned the two environments in order to  
111 understand why children and older participants are better at using allocentric strategies in the  
112 presence of geometric cues. We estimated several navigation variables based on the trajectory  
113 employed by our participants during the learning phase and searched for age differences across the  
114 two versions of the maze. Overall, we found that age differences were significant in the landmark  
115 version but not in the geometry version, indicating that learning a simple spatial rule (turn right at  
116 the intersection) in a maze composed of distal landmarks solely was already more difficult for older  
117 adults and children. Indeed, in the landmark version, older adults and children required a higher  
118 number of trials in order to reach the learning criterion (i.e. 4 consecutive trials where the subject  
119 navigates directly to the goal position, Wilcoxon rank sum test in children vs. young adults:  
120  $U = 226.5$ ,  $p = 0.065$ ; in older adults vs. young adults:  $U = 287.5$ ,  $p < 0.05$ ) whereas in the geometry version  
121 the three age groups had a nearly optimal performance, with a median number of trial needed of 4-5  
122 trials (minimum observable: 4, children vs. young adults:  $U = 213.5$ ,  $p = 0.19$ ; older adults vs. young  
123 adults:  $U = 141.5$ ,  $p = 0.55$ , fig. 3a). We then used one-way ANOVA (age factor with 3 modalities) on  
124 navigation variables averaged on the first four trials of the learning phase, which were common to all  
125 subjects. Age differences were significant in the landmark version for all considered navigation  
126 variables (fig. 3b-e and supp. fig. 4, see also supp. fig. 5 for scatter plots) and multiple comparisons of  
127 these data indicate that this main effect was due, most of time, to a difference between young adults  
128 and the two other groups (see. supp. table 2 for exceptions). In other words, when learning the  
129 position of a goal in a maze surrounded by landmarks, children and older adults travelled, on  
130 average, a longer distance to the goal (travelled distance:  $F_{(39,2)} = 5.58$ ,  $p < 0.01$ , fig. 3b) and it took  
131 them longer to reach the goal (escape latency:  $F_{(39,2)} = 9.29$ ,  $p < 0.001$ , fig. 3c). To go further in the  
132 analysis, we separated the trial into an orientation period (which corresponds to the time it took the  
133 subject to start walking after the trial started) and a navigation period (in which the subject walk to  
134 the goal, see Methods). We found out that part of the longer escape latency was due to the fact that

135 older adults took longer to start walking (orientation duration:  $F_{(39,2)}=3.54$ ,  $p<0.05$ , fig. 3d), likely  
136 indicating a lower confidence in taking decision when facing the environment composed of  
137 landmarks. Additionally, the average speed of the subject's trajectory was lower (average speed:  
138  $F_{(39,2)}=4.69$ ,  $p<0.05$ , fig. 3e, but also the normalized speed:  $F_{(39,2)}=3.76$ ,  $p<0.05$ , supp. fig. 4a) and thus  
139 the navigation period was longer ( $F_{(39,2)}=9.22$ ,  $p<0.001$ , supp. fig. 4b). Comparatively, the geometry  
140 version triggered no difference at all (travelled distance:  $F_{(34,2)}=1.58$ ,  $p=0.22$ , fig. 3b; escape latency:  
141  $F_{(34,2)}=1.47$ ,  $p=0.25$ , fig. 3c; orientation duration:  $F_{(34,2)}=0.71$ ,  $p=0.5$ , fig. 3d; average speed:  $F_{(34,2)}=0.32$ ,  
142  $p=0.73$ , fig. 3e; normalized speed:  $F_{(34,2)}=0.87$ ,  $p=0.43$ , supp. fig. 4a; navigation period:  $F_{(34,2)}=1.79$ ,  
143  $p=0.18$ , supp. fig. 4b). Older adults and children thus travelled a similar distance, were as quick to  
144 start walking and to reach the goal zone than young adults, indicating a good level of confidence and  
145 efficient learning capacities when they are exposed to an environment with a geometric polarization.  
146 Additionally, the learning curves seem steeper in the geometry version, probably indicating a one-  
147 shot learning process in our participants.

148 We next wondered whether age influenced the way people explore the environment that could  
149 ultimately explain difficulty in using the landmarks. To do so, we estimated the intersections  
150 between the gaze vector and the virtual environment (see Methods) and we divide this data into 3  
151 potentially informative areas of the environment, i.e. the sky region, the walls and the floor of the  
152 maze. Note that we did not record eye movements in children, hence analyses are restricted to the  
153 adult participants only. Figure 4 shows a double dissociation, with participants in the landmark  
154 version spending a higher proportion of time gazing at the sky regions (where the landmarks stand,  
155  $U=986$ ,  $p<0.0001$ ), whereas people in the geometry version spend more time gazing at the floor  
156 region ( $U=856$ ,  $p<0.0001$ , see supp. fig. 6 for data not averaged over learning trials). The average  
157 time spent on these critical areas of space was about 20% and people gazed to the maze walls for the  
158 remaining 80% of the trial time, independently of the versions considered ( $U=718$ ,  $p=0.57$ ). When  
159 visualizing spatial distribution of gaze intersections, we found out that people tend to look mainly at  
160 the circle landmark that was directly in front of the starting position in the landmark version and in  
161 the crotch area in the geometry version (heatmaps on fig. 4d,e). These critical areas were gazed  
162 during the beginning of the trial (mainly during the orientation period: supp. fig. 7). Importantly,  
163 older adults did not spend less time than young adults gazing to the sky region in the landmark  
164 version ( $U=119$ ,  $p=0.30$ , fig. 4a), suggesting that the incapacity of older adults to use allocentric  
165 strategies relative to landmarks is not related to a default of attention to those landmarks during the  
166 learning process.

167 To verify this point, we further separated our sample into egocenters and allocenters (see  
168 Methods on how we defined these two categories). Figure 5 shows that older egocenters and

169 allocenters spent a similar proportion of time gazing at the sky region during the learning phase  
170 ( $t_{(14)}=0.07$ ,  $p=0.95$ ). During the testing phase, however, we found an increased time spent gazing at  
171 the sky regions in people using an allocentric strategy (about 40% of the trial in both in young and  
172 older adults) whereas the egocenters kept the same level as in the learning phase (20% of the trial,  
173 allocenters vs. egocenters in the older group:  $t_{(14)}=2.24$ ,  $p<0.05$ ). To better describe this data, we  
174 further separated, among dwells directed to the sky, those directed to the circle, square, or star  
175 quadrants (fig. 5c) and estimated this variable over a window of 1s sliding over 15 (orientation  
176 period) and 35 (navigation period) time steps. Figure 5d shows that the young participants involved  
177 in an allocentric strategy gazed at the star quadrant (directly in front of the starting arm during the  
178 probe trials) during the beginning of the trial and this was apparently enough to understand where  
179 they were in maze and where the goal would be, indicating a good knowledge of the environment in  
180 this group. The older adults, although having the same early tendency to look at the star quadrant,  
181 exhibited an additional gaze component to the circle quadrant (fig. 5e), indicating that they might  
182 depend more heavily on the landmark experienced during the learning, that they might use it in a  
183 response-like manner (“to the right of the circle”). Finally, the egocenters in the older group gazed  
184 at the star quadrant (about 30% of the time at the beginning of the trial), but apparently this does  
185 not elicit much in their decision (fig. 5f). Data in the geometry version shows that people using an  
186 allocentric strategy gazed at the floor region early during the probe trials, and no apparent difference  
187 between the behaviour in young or older adults was observed (supp. fig. 8). Given these clear  
188 differences, we next wondered whether we could predict the strategy chosen by the subject by  
189 observing its eye movements. We trained a binary classifier, on a single-subject-single-trial basis,  
190 with the altitude of the gaze, relative to the eye level, averaged during the orientation period of the  
191 probe trials (fig. 6ab) as a predictor variable. To assess the performance of the classifier, we used a  
192 25% hold out validation procedure on 1000 runs of the classifier and a leave-one-out validation (see  
193 Methods). We found that the model could predict which version of the maze the subject was  
194 assigned to by looking at the mean gaze altitude of the subject during the orientation period, i.e.  
195 when the subject did not even start to move in the maze (on 1000 runs:  $P_{(\text{performance}<0.5)} = 0.0001$ ,  
196 leave-one-out: 88% of the subjects were correctly classified,  $n=49$ , fig. 6c). The spatial strategy  
197 chosen by the subject on probe trials could also be predicted, on a single-subject-single-trial basis, by  
198 gaze dynamics (on 1000 runs:  $P_{(\text{performance}<0.5)} = 0.05$ , leave-one-out: 79% of the subjects were correctly  
199 classified,  $n=26$ , fig. 6e), unlike the subject’s age which could not be predicted by gaze dynamic  
200 observation (on 1000 runs:  $P_{(\text{performance}<0.5)} = 0.5$ , leave-one-out: 55% of the subjects were correctly  
201 classified,  $n=49$ , fig. 6d).

202 The additional gaze component to the circle quadrant in the older adults could indicate that  
203 older adults were not using the same process as young ones when employing an allocentric strategy.  
204 Indeed, although our paradigm was dedicated to separate the subject behaviour between allocentric  
205 and egocentric response, ecological navigation cannot be always accounted by such a clear  
206 dichotomy. In other words, a subject using allocentric navigation strategy can nevertheless employ  
207 various subprocesses of varying nature<sup>20</sup>. Figure 7 shows navigation variables, restricted to  
208 participants who employed an allocentric strategy on the probe trials. We found that using an  
209 allocentric strategy in relation to landmarks came at a time cost in older adults. Indeed, two-way  
210 analysis of variance showed a significant interaction between the factors age and version on time-  
211 related variables (normalized escape latency:  $F_{(32,1)}=4.21$ ,  $p<0.05$ , fig 7a; orientation duration:  
212  $F_{(32,1)}=6.95$ ,  $p<0.05$ , fig. 7b; time in central area:  $F_{(32,1)}=8.89$ ,  $p<0.01$ , fig. 7c, but not on the distance-  
213 related variable, normalized travelled distance:  $F_{(32,1)}=0.33$ ,  $p=0.57$ , data not shown). Multiple  
214 comparison indicates that this interaction was due to older adults in the landmark version being  
215 longer to initiate walking, spending a longer time in the central area of the maze (up to 33 seconds in  
216 the first trial in one of our subjects, fig. 7c) and, as a result, being longer than young ones to reach  
217 the goal (supp. tab. 3). In comparison, in using an allocentric strategy in relation to the geometry,  
218 older adults were just as quick as young ones to make their decisions and as fast to reach the goal,  
219 arguing in favour of similar processes used in these two age groups (supp. tab. 3). The qualitative  
220 representations of the subjects' behaviour during the first probe trial (fig. 7d,e) also supports the fact  
221 that older adults might not be using the same processes as young ones when employing an  
222 allocentric strategy, as it is defined by our experimental paradigm. Indeed, we observed that, unlike  
223 young adults, the older adults tended to stop in the central area of the maze and adopt the view  
224 experienced during the learning phase (i.e. gazing in the direction of the red circle), suggesting that  
225 these subjects might be trying to solve the probe trial with a view-matching behaviour rather than a  
226 purely allocentric one.

227 We next wanted to know whether our subjects could be distinguished on visual or cognitive  
228 dimensions. For this analysis, we used the screening tests (see supp. tab. 4 for a detailed description  
229 of these tests) performed by some of our adult participants (up to  $n=48$ , depending on the test) in  
230 the Silversight cohort framework. We first used a principal component analysis (fig. 8a) in order to  
231 differentiate global visuo-cognitive profiles in our subjects. We found out that subjects could be  
232 discriminated on the first component based on their age (young vs. older participants:  $U=55$ ,  
233  $p<0.0001$ ) but also, among the older groups, based on the strategy they used during the probe trials  
234 (allocentrers vs. egocentrers in the old group:  $U=117$ ,  $p<0.01$ ). When assessing the performance of  
235 subjects on each individual screening test, we found, here as well, a significant age effect on almost

236 all tests (“Age effect” on fig. 8b). We also assessed, among the older group of subjects, whether  
237 visuo-cognitive functions differed between subjects who performed the landmark version or the  
238 geometry version (“Version effect”, on fig. 8b). This control was made to ensure that our sample was  
239 a priori homogeneous, and that an uneven distribution of visuo-cognitive profiles between the two  
240 versions of the maze could not explain our principal result, i.e. that older are better to use allocentric  
241 strategies in relation to geometric cues. We did not find any significant version effect in the older  
242 group (all  $p > 0.1$ ). Next, we wanted to compare profile of allocenters and egocenters, in the old  
243 group (“Choice effect” in fig. 8b). We found that egocenters had lower capacity in terms of  
244 perspective taking ( $t_{(24)}=2.63$ ,  $p < 0.05$ , fig. 8c), mental flexibility ( $U=167$ ,  $p < 0.05$ , fig. 8d) and contrast  
245 sensitivity, especially at high frequencies (fig. 8e, 0.5 circle per degree (CPD):  $t_{(21)}=1.87$ ,  $p=0.08$ ; 1  
246 CDP:  $t_{(21)}=0.48$ ,  $p=0.63$ ; 2 CDP:  $t_{(21)}=2.11$ ,  $p < 0.05$ ; 4 CDP:  $t_{(21)}=2.37$ ,  $p < 0.05$ ; 8 CDP:  $t_{(21)}=2.39$ ,  $p < 0.05$ ;  
247 16 CDP:  $U=101$ ,  $p < 0.001$ ), when compared to allocenters. Two-sample comparisons were also close  
248 to significance for the tests assessing 3d mental rotation ( $U=248$ ,  $p=0.065$ ) and working memory  
249 functions ( $U=249$ ,  $p=0.0501$ , see complete data in supp. figs. 9 and 10). In other words, having a  
250 lower capacity to perceive fine details and lower executive and visuo-spatial abilities seems to be  
251 associated with a decrease usage of allocentric strategies.

252 Finally, a subset of subjects ( $n=20$ , 7 older adults and 13 children) performing the landmark  
253 version was asked, at the end of the experiment, to recognize the maze shape (among 3 possibilities,  
254 supp. fig. 11a), the landmarks (among 6 possibilities, supp. fig. 11b) and to draw a top-view map of  
255 maze they experienced. For the drawings, we assessed whether the constellation order was correct  
256 (supp. fig. 11c for a counterexample), the landmarks positioned correctly relative to the maze (supp.  
257 fig. 11d for a counterexample) and finally whether the goal zone was placed correctly relative to the  
258 landmarks. We found that the majority of subjects were capable to recognize the correct shape  
259 (85%) and the landmarks (100%) that they have seen during the experience. When drawing the map,  
260 however, approximately half of the subjects were not capable to remember the correct constellation  
261 order (45%), had a wrong landmark positioning (45%) and, as result, the goal positioning relative to  
262 landmarks was incorrect (65%, supp. fig. 11e). Interestingly, among the subjects who did at least one  
263 error on the drawing, 11 out 15 used an egocentric or return strategy in the testing phase, likely  
264 indicating that the landmarks are not bounded correctly to the representation of space, in those  
265 subjects.

## 266 **Discussion**

267 By testing the navigation strategies used by subjects of three age groups in a maze composed of  
268 either landmarks or geometric cues, this study provides an evidence that geometric cues potentiate

269 the use of allocentric strategies in children (~10 yo) and older adults (>65 yo). When landmarks were  
270 the only source of information that could be used to define locations allocentrically, we observed a  
271 preference for egocentric strategies at both ends of the life course, forming an inverted-profile of  
272 strategies usage across the lifespan. When geometric cues could be used however, the pattern of  
273 results changed drastically. The proportion of spontaneous use of allocentric strategies significantly  
274 increased in both children and older adults, reaching the same level as young adults. By analysing in  
275 detail the behaviour of our subjects (head motion and gaze dynamics), we have shown that learning  
276 locations in an environment composed of landmarks solely was already more problematic in children  
277 and older adults, independently of the strategy preference. This age-related incapacity to use land-  
278 marks was not due to a default of attention, given that future egocenters and allocenters spent a  
279 similar proportion of time gazing at landmarks during the learning process. In the few older  
280 participants still capable to employ an allocentric strategy in relation to landmarks, our results  
281 indicate that the implementation of the strategy came at a large time cost, and that these subjects  
282 might be using one the three landmarks in a response manner ("to the right of"). We observed that  
283 egocenters, although gazing at the landmarks, failed to use them to define locations. This was  
284 probably due to the fact that landmarks are not bounded correctly to the representation of space,  
285 early in development and with advancing age. We have found that providing geometric cues  
286 eliminates age differences in all the variables we observed: older adults and children were very  
287 efficient to learn locations in the environment geometrically polarized, and they were just as quick as  
288 young adults at making decisions and at implementing the strategy. This result indicates that older  
289 adults and children might not be as bad navigators as previously thought if geometric cues are  
290 available. Confirming previous results in real-world condition<sup>18</sup>, our results show that geometry is  
291 visually extracted by gazing at the floor, in a virtual environment as well.

292 Confronting our data with the existing literature allow us to confirm the preference for  
293 egocentric strategies in older adults, when the environment layout does not provide a geometric  
294 polarizing information and when performance, therefore, is based on landmarks only (using the Y-  
295 maze paradigm or others<sup>7-12</sup>). Regarding development, we complement previous evidence by  
296 showing a spontaneous preference for egocentric strategies in 10-year-old children when learning of  
297 a single stimulus-response association is required (as opposed to the more complex maze<sup>6</sup>). We add  
298 that this age-related strategy preference is not related to sensory restriction due to most-often used  
299 desktop virtual reality, given that our subjects show the same behaviour with an immersive head-  
300 mounted display, allowing both proprioceptive and vestibular information to be experienced during  
301 navigation. In addition, we proposed a divergent interpretation of this data, whereby the preference  
302 for an egocentric strategy observed in previous studies was actually conditioned by the sensory cues



303 present in the environment (i.e. an issue with landmark processing) rather than a strategic choice per  
304 se. This interpretation fits well with other data showing that estimating and reproducing distances  
305 and rotations was relatively poor in older adults when the visual environment was composed of a  
306 circular (thus unpolarized) arena<sup>21</sup> and that performance did not increase when landmarks were  
307 provided<sup>22</sup>. Our data fits also with paradigms of route learning, whereby retrieval of the contextual  
308 information (spatial position<sup>23</sup> and/or temporal order<sup>24,25</sup>) about landmarks is impaired in older  
309 adults. The fact that free recall for landmarks was preserved in those studies is also confirmed by  
310 present results. In the light of the current study, we question whether path integration performance  
311 and route learning in large environments would be better in older adults and children when  
312 polarized layouts are used.

313       Altogether, our results suggest a critical function of geometry for orientation and navigation  
314 across the lifespan, which allows people of all age to quickly understand the layout, their own  
315 position within it and learn specific locations in space. Reference to geometry could thus represent a  
316 sort of default mode for spatial representation, which is well preserved across the lifespan, whereas  
317 landmark-based representation is developed at adult age. It may also require an additional cognitive  
318 effort for landmarks to be bounded to space representation. Our findings highlight the necessity to  
319 rethink the impact of age on spatial cognition and reframe the classical allocentric/egocentric  
320 dichotomy in order to integrate a landmark/geometry opposition that better explain age-dependent  
321 navigation deficits. It remains to be understood what makes geometry special relative to landmark  
322 and why we observe an age-related failure in anchoring the "cognitive map" with respect to  
323 landmarks. One possibility is that different sub-networks in the brain mediate the processing of  
324 geometric and landmark cues and that the sub-network dedicated to geometric processing is  
325 matured earlier in development and better preserved in aging. Experiments in our group are on-  
326 going in order to differentiate the brain areas implicated in geometry vs. landmark processing in  
327 humans, and characterize age-related cortical and sub-cortical dysfunctions potentially explaining  
328 why older adults and children are better at using allocentric strategies in the presence of geometric  
329 cues.

## 330 **Methods**

### 331 **Participants**

332       Seventy-nine subjects were included in this study: 29 children (range: 10-11 yrs,  $\mu=10$ ,  $\delta=0.49$ ,  
333 17 females, 12 males), 22 young adults (range: 23-37 yrs,  $\mu=28$ ,  $\delta=4.28$ , 13 females, 9 males) and 28  
334 older adults (range: 67-81 yrs,  $\mu=73$ ,  $\delta=3.90$ , 17 females, 11 males). The adult participants were part

335 of the SilverSight cohort population (~350 enrolled subjects) at the Vision Institute - Quinze-Vingts  
336 National Ophthalmology Centre, in Paris. The child participants were recruited in a primary school in  
337 the Paris area. All participants were voluntary and gave informed consent (parents gave informed  
338 consent for their child). The procedures were performed in accordance with the tenets of the  
339 Declaration of Helsinki, and they were approved by the Ethical Committee CPP Ile de France V  
340 (ID\_RCB 2015-A01094-45, No. CPP: 16122 MSB). Adult participants were included in the study based  
341 on the following criteria: *i*) corrected visual acuity of at least 7/10, or 5/10, in participants younger or  
342 older than 70 years, respectively; *ii*) a Mini-Mental State Examination score of 24 or higher; *iii*) no  
343 physical inability in terms of locomoting without assistance (the complete list of inclusion/exclusion  
344 criteria used for the Silversight cohort are described in supp. tab. 5). The clinical and functional  
345 assessment of the Silversight cohort involved: ophthalmological screening (e.g., optical coherence  
346 tomography, fundus photography), functional visual screening (e.g., visual acuity, visual field extent,  
347 contrast sensitivity, attentional field of view), otorhinolaryngological examination (e.g., audiogram,  
348 vestibular function), cognitive-neuropsychological assessment (e.g., visuo-spatial memory, mental  
349 rotation, executive functions), oculomotor evaluation (e.g., ocular fixation, saccadic control), and a  
350 static/dynamic balance assessment. Among this multivariate assessment, we selected a subset of  
351 screening tests in order to control, as much as possible, for multiple co-factors at stake during spatial  
352 cognition, possibly entailing an unbiased interpretation of spatial behavioral data (e.g., with respect  
353 to inter-individual variability). These screening tests evaluated visual functions (contrast sensitivity at  
354 different spatial frequency) and cognitive functions (memory and executive functions, visuo-spatial  
355 abilities), which are detailed in supplementary figure 4. Participants habitually wearing far-vision  
356 lenses were encouraged to keep their glasses on during the experiment.

## 357 **Material**

358 The experiment with the adult participants was performed in the Streetlab platform at the  
359 Institute of Vision and in a school gymnasium with the children participants. The virtual reality (VR)  
360 environment was created using the Unity3D game engine (Unity Technologies) and displayed in a  
361 HTC VIVE headset equipped with a Tobii Pro VR binocular eye tracker. Participants were equipped  
362 with a VR capable backpack computer (VR One, MSI). Experiment control and monitoring were  
363 performed remotely. This equipment allows the participant to move freely and explore the virtual  
364 environment with a feeling of immersion.

365 The real head position was tracked at 30 Hz by two laser emitters placed 9 m away from each  
366 other and at a height of 3 m allowing an experimental capture area of approximately 4.0 x 4.0 m. The  
367 HTC VIVE display had a nominal field of view of about 110° through two 1080 x 1200 pixels displays,



368 updated at 90 Hz. The pixel density of the display was about 12 pixels/degree. The Tobii eye-tracker  
369 recorded eye movements at a rate of 120 Hz. The material used with the child participants was the  
370 same as for adults, with the difference that we did not use the Tobii eye-tracking integration with the  
371 children.

## 372 **Virtual environments**

373 The two versions of the Y-maze were composed of 3 corridors, with walls covered by a non-  
374 informative homogeneous texture. The height of the walls was adapted to be 10 cm taller than the  
375 subject's height, in order for all the subjects to have to exact same visual experience. In the landmark  
376 condition, the Y-maze had equiangular arms separated by 120° (fig. 1a). Each corridor was 66 cm  
377 large and 190 cm long. Three distal landmarks were placed outside of the maze, that is 8m above the  
378 walls and 20m from the centre of the maze. These were a green star, a blue square and a red circle,  
379 each subtending a visual angle of 10° relative to the centre of the maze. In the geometric condition,  
380 the geometric polarization of the maze was achieved by an anisotropic arrangement of the 3 arms,  
381 with the angle between arms being 155° for two sides and 50° for the last one. Each corridor was 66  
382 cm large and 230 cm long and there were no distal landmarks in this condition. The corridors were  
383 longer in the geometric condition to prevent the subject from seeing the end of corridors when  
384 starting from any location. The maze was 1.54 times larger in the geometric condition with respect to  
385 the landmark condition. Subjects were randomly assigned to the landmark or geometry condition but  
386 we ensured an equal distribution of gender throughout the two groups. There were no shadows and  
387 the sky was homogeneous. Supplementary results 1 and supplementary figure 1(a-c) show that the  
388 performance of young adults between the geometry version and the landmark version were similar,  
389 arguing in favour of an equivalent level of difficulty in the two versions.

## 390 **Protocol**

391 The experiment lasted 30min approximately and started with the calibration of the eye-tracking  
392 device. After adjusting the headset's position and the inter-pupillary distance, the subjects  
393 performed a nine-points calibration without moving their head. To ensure the quality of the  
394 calibration procedure, a validation of the same nine points was performed. Whenever the mean  
395 angular error of the calibration was above 3°, the calibration process was started over. Validation  
396 (and recalibration if required) was performed at the beginning, halfway through and at the end of  
397 the experiment. During the experiment, the subject was disoriented before each trial. This procedure  
398 required the subject to hold the experimenter's hands and be passively led around the room with  
399 eyes closed. A non-informative sound was display in headphones during the disorientation procedure  
400 to mask potentially uncontrollable sound from outside of the experimental room. We controlled that

401 the disorientation procedure was truly effective by asking the subject to try pointing towards a  
402 computer, which was at the exit of the experimental room. Once disoriented, subjects were  
403 positioned at one of three starting positions (position A, B and C on Fig. 1), facing the center of the  
404 maze. At the end of each trial, the image displayed in the headset faded and the subject was  
405 instructed to close their eyes. Furthermore, the subject was told that walking through the virtual  
406 walls and standing on tiptoes were forbidden. The experiment proceeded as follows: during the  
407 “exploration phase”, the subject went through 3 exploration trials, of 60 seconds each, starting from  
408 one of the three starting positions (fig. 1, areas A, B and C). There was no specific task during these  
409 trials. The participant was instructed to explore the whole environment. Whenever the subject did  
410 not explore one of the corridors or did not look up in the direction of the landmarks, the  
411 experimenter gave a prompt by saying: "Make sure to explore the whole environment". During the  
412 “learning phase”, the subject had to find a goal that triggered a rewarding sound. The goal was  
413 located at the end of corridor on the right (fig. 1, area C with dashed line which was 0.4m of radius).  
414 The starting location (fig. 1, area A) was the same throughout the learning phase. The subject was  
415 instructed to navigate as directly as possible to the goal zone. The learning phase ended after 4  
416 consecutive successful trials, which were defined as a trajectory going directly to the goal zone  
417 without entering the corridor on the left. Then, during the “testing phase”, the subject was  
418 instructed to return to the goal zone and warned that there would be no rewarding signal this time.  
419 The starting position during these trials was changed, unknown to the subject, and followed the  
420 same pseudo-random order across subjects. The predefined order of starting location areas was: B,  
421 A, A, B, A, B. Trials starting from position B were the “probe trials”. Trials starting from A were the  
422 “control trials”, not analysed here. For the testing phase, the trial ends automatically when the  
423 subject stops for at least 5seconds in one of the three possible areas (A, B or C). At the end of the  
424 experiment, a subset of subjects (n=20) performing the landmark version was asked “subsidiary  
425 questions” by the experimenter. They were asked to *i*) indicate the shape of the maze they  
426 experienced among 3 different possibilities (supp. fig. 11a), *ii*) the landmarks that they noticed during  
427 the experiment between 6 possibilities (supp. fig. 11b), and *iii*) to draw a top-view map of maze they  
428 experienced (including walls, landmarks and goal position).

## 429 **Data processing**

430 We first removed the two first seconds of recording, before which no image was displayed in the  
431 HMD. Then, we interpolated the head position (30 Hz) to fit the format of the eye-tracker data (120  
432 Hz). The trial time was separated into an orientation period and navigation period. The orientation  
433 period starts when the image is displayed in the HMD until movement initiation, which is defined as  
434 the moment the subject surpasses a virtual circle of 0.3m around the starting position. The

435 navigation period lasts until the subject enters the goal area (during the learning phase) or one of the  
436 three areas (A, B or C during the testing phase). Concerning the eye-tracking data, we estimated a  
437 cyclopean gaze vector by averaging data from the left and the right eye. If the signal from one eye  
438 was judged too noisy, by visual inspection, we used the data from the second eye. When then  
439 calculated the intersection of the gaze vector with 3 main environment plans: the walls, the floor and  
440 the sky region. For the later, we intersected the vector with a virtual sphere with a radius of 6m  
441 around the maze centre.

442 The navigation strategy was defined as the first area (A, B, C) entered by the subject on the  
443 probe trials. Whenever the subject first entered the actual goal location (fig. 1, area C with the  
444 dashed line), he/she was classified as using an allocentric strategy for that particular trial. Otherwise,  
445 if the subject represents the goal position relative to his own body position, he would navigate to  
446 area A and be using an egocentric strategy for that trial. Finally, the subject could also to return to  
447 the starting arm (B). This third, less observed possibility was termed a return strategy. We further  
448 separate our sample of subjects into “allocentrers” and “egocentrers” based on their choices on the  
449 probe trials. If a subject had a majority of allocentric or egocentric choices (2/3 or more), he/she was  
450 classified as allocentrer or egocentrer, respectively. Supplementary table 1 summarizes the number  
451 of observations and the mean and standard deviation of age in these two categories. Note that there  
452 were one children and one older subject who returned to the starting position on 2/3 or more probe  
453 trials (i.e. returning to area B) in the landmark version. Those two subjects are excluded from the  
454 analyses comparing allocentrers and egocentrers.

455 Several navigation variables were estimated, based on the trajectory of head positions, recorded  
456 by the HMD. Navigation performance was evaluated through several navigation variables. First, the  
457 number of trial needed to reach the learning criterion corresponded to the number of trials until  
458 reaching 4 consecutive trials where the subject goes directly to the goal area in the right arm,  
459 without entering the left arm (minimum: 4 trials). The escape latency and the travelled distance  
460 measured the time (in seconds) and distance (in meters) until reaching the goal zone. Given that the  
461 geometric version of the maze was slightly longer than the landmark one, we further normalized  
462 these two variables by the maze length. We also estimated the duration of the orientation period  
463 (from trial start until movement initiation, see definition above), the navigation period (from  
464 movement initiation until reaching the goal zone), and the time spent in the central area. The central  
465 area encompassed the last third of the three arms. Finally, we also estimated the average  
466 instantaneous speed of the trajectory from movement initiation until reaching the goal zone. Given  
467 that the walking speed is influenced by the subject’s height<sup>26</sup> and that children were shorter than the  
468 adult participants, we also normalized the speed by the height.

469 The eye-tracking data were recorded for the adult participants only. The main variable we were  
470 interested to was the dwell time proportion, which corresponds to the proportion of time spent  
471 fixating either the walls, the floor or the sky region, normalized by the duration of the period  
472 considered. Missing data were not taken into account when normalizing this variable. There were, on  
473 average, a proportion of 0.27 and 0.22 missing data in the older group and the young group,  
474 respectively. Among the fixations directed to the sky, we further separated those directed to the  
475 circle, square, or star quadrant (fig. 5c). No particular attempt was made to separate fixations from  
476 saccades. Finally, for spatial distribution representations (i.e. heatmaps), we accumulated the gaze  
477 vector intersections and normalized the maps separately, for each group of subjects considered.

478 We used a generalized linear regression model in order to predict either the version of the maze  
479 the subject performs, his age or the spatial strategy he will employ on the probe trials. We used the  
480 averaged altitude of the gaze relative to eye level (in degrees) during the orientation period as an  
481 predictor variable and the version (i.e. landmark or geometry), the age (i.e. young or older) or the  
482 strategy (i.e. allocentric or egocentric) as binary response. We used two validation procedures: a 25%  
483 hold out validation on 1000 runs of the binary classifier where the trained model was tested on  
484 remaining 25% of the subjects, and leave-one-out validation, where the model was tested on the  
485 remaining subject. The performance of the model was assessed as the proportion or the number of  
486 correctly predicted response. The validation sets included all the three probe trials of a single  
487 subject, meaning that the model was not predicting some trials while being trained on the remaining  
488 trials of a single subject. The strategy was predicted for the subjects performing the landmark version  
489 only. Indeed, only two subjects choose the egocentric option in the geometry version, making it  
490 impossible for the model to learn appropriately.

491 Concerning the subsidiary questions, subjects were asked to recognize the maze shape among 3  
492 possibilities ("shape recognition", supp. fig. 11a,e), the landmarks that were present among 6  
493 possibilities ("landmark recognition", supp. fig. 11b,e) and to draw a top-view map of maze they  
494 experienced. For the scoring of the drawings, three other parameters were evaluated separately.  
495 First, whether the landmark constellation was drawn in the correct order, whatever its position  
496 ("constellation order", supp. fig. 11c,e). Second, whether the positioning of the landmarks was in-  
497 between arms and not at the end of the arm, whatever the constellation order ("landmark  
498 positioning", supp. fig. 11e). Third, if the subject positioned the goal in the correct arm, relative to  
499 the landmarks ("goal positioning", supp. fig. 11e).

## 500 **Statistical analyses**

501       When the data were continuous and when normality and homoscedasticity allowed it, we used  
502 two-sample t-test (when comparing two subgroups), one-way ANOVA (when comparing three  
503 subgroups) and two-way ANOVA (when comparing two factors: age\*version). Normality was verified  
504 by the Lilliefors normality test and visual inspection of Q-Q plots. Box-Cox transformation could be  
505 used to achieve normality and equalize variance<sup>27</sup>. We used two-sample Wilcoxon rank sum test or  
506 Fisher's exact probability test for ordinal data and contingency table, respectively. Alpha level for  
507 statistical significance was set at  $P < 0.05$ .

## 508 **References**

- 509 1. Burgess, N. Spatial cognition and the brain. *Ann. N. Y. Acad. Sci.* **1124**, 77–97 (2008).
- 510 2. Ekstrom, A. D. & Isham, E. A. Human spatial navigation: representations across dimensions  
511 and scales. *Curr. Opin. Behav. Sci.* **17**, 84–89 (2017).
- 512 3. Lester, A. W., Moffat, S. D., Wiener, J. M., Barnes, C. A. & Wolbers, T. The aging navigational  
513 system. *Neuron* **95**, 1019–1035 (2017).
- 514 4. Newcombe, N. S. Navigation and the developing brain. (2019). doi:10.1242/jeb.186460
- 515 5. Nardini, M., Burgess, N. & Breckenridge, K. Differential developmental trajectories for  
516 egocentric, environmental and intrinsic frames of reference in spatial memory. **101**, 153–172  
517 (2006).
- 518 6. Bullens, J., Iglói, K., Berthoz, A., Postma, A. & Rondi-Reig, L. Developmental time course of the  
519 acquisition of sequential egocentric and allocentric navigation strategies. *J. Exp. Child Psychol.*  
520 **107**, 337–350 (2010).
- 521 7. Colombo, D. *et al.* Egocentric and allocentric spatial reference frames in aging: A systematic  
522 review. *Neurosci. Biobehav. Rev.* **80**, 605–621 (2017).
- 523 8. Wiener, J. M., de Condappa, O., Harris, M. a & Wolbers, T. Maladaptive bias for  
524 extrahippocampal navigation strategies in aging humans. *J. Neurosci.* **33**, 6012–7 (2013).
- 525 9. Bohbot, V. D. *et al.* Virtual navigation strategies from childhood to senescence: evidence for  
526 changes across the life span. *Front. Aging Neurosci.* **4**, 28 (2012).
- 527 10. Davis, R. L. & Weisbeck, C. Search Strategies Used by Older Adults in a Virtual Reality Place  
528 Learning Task. *Gerontologist* **55**, S118–S127 (2015).
- 529 11. Driscoll, I., Hamilton, D. A., Yeo, R. A., Brooks, W. M. & Sutherland, R. J. Virtual navigation in  
530 humans: The impact of age, sex, and hormones on place learning. *Horm. Behav.* **47**, 326–335  
531 (2005).

- 532 12. Rodgers, M. K., Sindone, J. A. & Moffat, S. D. Effects of age on navigation strategy. *Neurobiol.*  
533 *Aging* **33**, 997–1003 (2012).
- 534 13. Ruggiero, G., D’Errico, O. & Iachini, T. Development of egocentric and allocentric spatial  
535 representations from childhood to elderly age. *Psychol. Res.* **80**, 259–272 (2016).
- 536 14. Harris, M. A., Wiener, J. M. & Wolbers, T. Aging specifically impairs switching to an allocentric  
537 navigational strategy. *Front. Aging Neurosci.* **4**, 1–9 (2012).
- 538 15. Moffat, S. D. Aging and spatial navigation: what do we know and where do we go?  
539 *Neuropsychol. Rev.* **19**, 478–89 (2009).
- 540 16. Lithfous, S., Dufour, A. & Després, O. Spatial navigation in normal aging and the prodromal  
541 stage of Alzheimer’s disease: insights from imaging and behavioral studies. *Ageing Res. Rev.*  
542 **12**, 201–13 (2013).
- 543 17. Raz, N., Rodrigue, K. M., Head, D., Kennedy, K. M. & Acker, J. D. Differential aging of the  
544 medial temporal lobe: a study of a five-year change. *Neurology* **62**, 433–438 (2004).
- 545 18. Bécu, M. *et al.* Age-related preference for geometric spatial cues during real-world navigation.  
546 *Nat. Hum. Behav.* (2019).
- 547 19. Hermer, L. & Spelke, E. A geometric process for spatial reorientation in young children. *Nature*  
548 (1994).
- 549 20. Ekstrom, A. D., Huffman, D. J. & Starrett, M. Interacting networks of brain regions underlie  
550 human spatial navigation : a review and novel synthesis of the literature. *J. Neurophysiol.* **118**,  
551 3328–3344 (2017).
- 552 21. Mahmood, O., Adamo, D., Briceno, E. & Moffat, S. D. Age differences in visual path  
553 integration. *Behav. Brain Res.* **205**, 88–95 (2009).
- 554 22. Harris, M. a & Wolbers, T. Ageing effects on path integration and landmark navigation.  
555 *Hippocampus* **22**, 1770–1780 (2012).
- 556 23. Jansen, P., Schmelter, A. & Heil, M. Spatial knowledge acquisition in younger and elderly  
557 adults: A study in a virtual environment. *Exp. Psychol.* **57**, 54–60 (2010).
- 558 24. Head, D. & Isom, M. Age effects on wayfinding and route learning skills. *Behav. Brain Res.* **209**,  
559 49–58 (2010).
- 560 25. Wilkniss, S. M., Jones, M. G., Korol, D. L., Gold, P. E. & Manning, C. A. Age-related differences  
561 in an ecologically based study of route learning. *Psychol. Aging* **12**, 372–375 (1997).

562 26. Samson, M. M. *et al.* Differences in gait parameters at a preferred walking speed in healthy  
563 subjects due to age, height and body weight. *Aging Clin. Exp. Res.* (2001).

564 27. Osborne, J. W. Improving your data transformations : Applying the Box-Cox transformation.  
565 *Pract. Assessment, Res. Eval.* **15**, 1–9 (2010).

### 566 ***Acknowledgements***

567 This research was supported by ANR—Essilor SilverSight Chair No. ANR-14-CHIN-0001. The  
568 funders had no role in the study design, data collection and analysis, decision to publish or  
569 preparation of the manuscript. We thank S. Mohand-Said of the Clinical Investigation Centre of the  
570 Quinze-Vingts Hospital, Paris, for medical supervision during clinical screening of participants. We  
571 also thank K. Lagrené, from the Aging in Vision and Action laboratory at Vision Institute, for helping in  
572 enrolling/profiling the participants. Finally, the authors wish to thank E. Gutman, J. Lebrun and C.  
573 Authié of the Streetlab team for technical support in setting up the experiments in the Streetlab  
574 platform.

### 575 ***Author contributions***

576 M.B., S.R., A.O.L., D.S., A.A. designed the experiment, M.B., A.O.L., S.R., G.T. collected and  
577 analysed the data, M.B., D.S., A.A. wrote the article.

### 578 ***Competing interest***

579 The authors declare no competing interest.

13 **Abstract**

14       The impact of development and healthy aging on spatial cognition has been traditionally  
15 attributed to a difficulty in using allocentric strategies and a preference for egocentric ones. An  
16 alternative possibility, suggested by our previous works, is that this preference is actually  
17 conditioned by the spatial cues (e.g. geometric or landmark cues) present in the environment rather  
18 than a strategic choice per se. We tested this prediction by having 79 subjects (children, young and  
19 older adults) navigating a Y-maze composed either of landmarks or geometric cues, with an  
20 immersive head-mounted display that allows us to record both head and eye movements. Our  
21 results show that when the performance is based on landmarks solely, children and older adults  
22 exhibit a deficit in using allocentric strategies when compared to young adults. Hence, an inverted U-  
23 profile of allocentric strategies was observed across the lifespan. This was not due to a default of  
24 attention to the landmarks, as evidenced by analysis of gaze dynamics. When geometric cues were  
25 provided, however, older adults and children used allocentric strategies in the same proportion as  
26 young adults. They were, in addition, as efficient and quick to implement the strategy. We thus  
27 propose a reinterpretation of the previous data in the literature, whereby reference to geometric  
28 cues is the default mode for spatial representations, which is immune to age, whereas spatial  
29 representations fail to be anchored on landmarks early in development and later in aging. This new  
30 interpretation has the potential to reunify several data from the literature, ranging from spatial cues  
31 processing to strategy preference, and including other spatial skills like path integration and route  
32 learning.

33



34 Spatial information about location can be represented according to two reference frames. In an  
35 egocentric frame of reference, locations are represented relative to the subject's body, whereas in  
36 an allocentric frame of reference, locations are represented relative to external environmental  
37 elements<sup>1</sup>. The use of allocentric and egocentric strategies is highly influenced by specific situations  
38 the navigator is facing<sup>2</sup> but also by the navigator's individual characteristics. Among the later, age  
39 critically influence the way people navigate in space<sup>3</sup>.

40 Developmental and aging data seem to suggest an inverted U-profile of allocentric processing  
41 with age. In young children, spatial navigation seems to be preferentially guided by egocentric  
42 representations, although some form of allocentric coding can be present early in development<sup>4,5</sup>.  
43 For instance, by having children aged between 5 and 10 navigating a multiple-armed maze  
44 surrounded by distal landmarks, Bullens et al. (2010) showed that a majority of children used an  
45 sequential egocentric strategy spontaneously<sup>6</sup>. The use of allocentric strategies emerged gradually  
46 later on during development, from 7 to 10 years of age. At the other end of the curve, converging  
47 evidence supports a decreased use of allocentric strategies (and a preference for egocentric ones) in  
48 older subjects, when compared to young ones<sup>7-12</sup>. For instance, Rodgers et al. (2012) used a  
49 paradigm allowing to dissociate allocentric and egocentric strategies in a 3-armed maze (so-called Y-  
50 maze)<sup>12</sup>. After having learned to position of a goal starting from one arm of the maze, the subject  
51 was positioned in the second arm of the maze and asked to return to the goal position. The subject's  
52 strategy was classified as egocentric if the subject made the same turn as during the learning phase  
53 and allocentric if he or she moved to the correct goal location. Results showed that older adults were  
54 more likely in this situation to use an egocentric strategy, in comparison to young adults. These age-  
55 related shifts in strategy use have been interpreted in relation to the slow maturation (in  
56 development) and early deterioration (in aging) of the brain areas involved in spatial navigation (e.g.  
57 the hippocampus or frontal areas<sup>13-17</sup>).

58 An alternative hypothesis has been proposed recently. In a study in ecological conditions, Bécu et  
59 al. (2019) showed that healthy aging was associated with an increased preference for geometric  
60 spatial cues<sup>18</sup>. Whereas young adults relied on landmark cues, older adults preferentially used  
61 geometric cues to reorient in space, at the detriment of the landmarks. This preference for geometry  
62 has been linked in older adults to a difficulty in either take perspective or code locations relative to  
63 landmarks. These results potentially challenge the classical view for a specific deficit of allocentric  
64 strategy in aging, given that standard paradigms that tested navigational strategies are exclusively  
65 dependent on the capacity of the subjects to use distal landmarks<sup>8-12</sup>. Furthermore, geometric cues  
66 in these paradigms were always unpolarized and could thus not be used for orientation. It is thus  
67 possible that age-related navigation difficulties, previously explained by a specific deficit of

68 allocentric strategies, are actually linked to a difficulty in processing landmarks. If this interpretation  
69 is true, providing geometric information could potentiate the use of allocentric strategies both in  
70 older adults and children, in which a preference<sup>19</sup> for geometric cues has also been shown<sup>19</sup>.

## 71 **Results**

72 To test this hypothesis, we adapted the Y-maze paradigm by introducing a geometric polarization  
73 to the maze to test the strategy use in a sample of seventy-nine subjects (29 children, 22 young  
74 adults and 28 older adults). We used an immersive virtual reality head-mounted display in order for  
75 the participant to experience proprioceptive and vestibular inputs while navigating freely in the  
76 virtual environment. By recording eye movements while the subject navigated, we sought to unveil  
77 potential gaze-related processes that could explain age-related difficulty in using landmarks and to  
78 get a deeper insight into the nature of the processes involved during spatial navigation. The  
79 participants of this study were randomly assigned to the landmark or the geometry versions. In the  
80 landmark version (fig. 1a), the maze had equiangular arms separated by 120° and it was surrounded  
81 by three distal landmarks. In the geometry version (fig. 1b), two arms were closer to each other (50°),  
82 thus providing a geometric polarization to the maze. The two versions had an equivalent level of  
83 difficulty, given that basic measures of spatial learning between the two versions were equivalent in  
84 young adults (see supp. results 1 and supp. fig. 1). During the “learning phase”, the subjects had to  
85 learn to position of an invisible goal that triggered a rewarding sound (dashed area on fig. 1ab),  
86 starting from the same position (position A on fig. 1ab). After having reached the goal position  
87 directly for 4 consecutive trials, the “testing phase” started. It consisted of six trials in which the  
88 starting position was changed, unknown to the subject, in a pseudo-random manner: three “probe  
89 trials” started from B, three “control trials” started from A (see Methods and supp. fig. 2 for a view  
90 experienced by the subjects in each version). The probe trials allowed us to test the reliance on  
91 external environmental information to code for the goal position. Indeed, if the subject used the  
92 distal landmarks (in the landmark version) or the geometric polarization (in the geometry version) to  
93 navigate to the actual goal position (C), he/she be using an allocentric strategy for that particular  
94 probe trial.

95 Figure 2 shows the proportion of time participants choose an allocentric strategy on the three  
96 probe trials. There was some intra-subject variability in the choices made, with subjects either  
97 choosing the allocentric option always or only on some of the trials. In the landmark version, we  
98 observed an inverted U-profile of allocentric strategy use related to age, with children and older  
99 adults being significantly less likely to use an allocentric strategy in this version, relative to young  
100 adults (Fisher’s exact probability test in children:  $p < 0.01$ ,  $\phi = 0.56$ , oddsratio: 18; in older adults:

101  $p < 0.01$ ,  $\phi = 0.53$ , oddsratio: 16.5). In the geometry version, there was no age difference in the  
102 observed proportion of allocentric choices (children:  $p = 0.28$ ,  $\phi = 0.27$ ; older adults:  $p = 0.22$ ,  $\phi = 0.32$ ,  
103 compared to young adults), with a majority of subjects in each age group using an allocentric  
104 strategy (see also supp. fig. 3). Together, these data support the fact that the traditional observation,  
105 whereby older adults and children exhibit a specific deficit in the use of allocentric strategies, to the  
106 benefit of egocentric ones, was actually erroneous. Indeed, when geometric cues are provided by the  
107 environment, children and older adults are just as efficient as young adults to use flexible and more  
108 complex allocentric strategies. These results suggest that the impairment previously observed across  
109 the lifespan is rather linked to a specific deficit in using landmarks to represent spatial locations.

110 We next wanted to compare how people explored and learned the two environments in order to  
111 understand why children and older participants are better at using allocentric strategies in the  
112 presence of geometric cues. We estimated several navigation variables based on the trajectory  
113 employed by our participants during the learning phase and searched for age differences across the  
114 two versions of the maze. Overall, we found that age differences were significant in the landmark  
115 version but not in the geometry version, indicating that learning a simple spatial rule (turn right at  
116 the intersection) in a maze composed of distal landmarks solely was already more difficult for older  
117 adults and children. Indeed, in the landmark version, older adults and children required a higher  
118 number of trials in order to reach the learning criterion (i.e. 4 consecutive trials where the subject  
119 navigates directly to the goal position, Wilcoxon rank sum test in children vs. young adults:  
120  $U = 226.5$ ,  $p = 0.065$ ; in older adults vs. young adults:  $U = 287.5$ ,  $p < 0.05$ ) whereas in the geometry version  
121 the three age groups had a nearly optimal performance, with a median number of trial needed of 4-5  
122 trials (minimum observable: 4, children vs. young adults:  $U = 213.5$ ,  $p = 0.19$ ; older adults vs. young  
123 adults:  $U = 141.5$ ,  $p = 0.55$ , fig. 3a). We then used one-way ANOVA (age factor with 3 modalities) on  
124 navigation variables averaged on the first four trials of the learning phase, which were common to all  
125 subjects. Age differences were significant in the landmark version for all considered navigation  
126 variables (fig. 3b-e and supp. fig. 4, see also supp. fig. 5 for scatter plots) and multiple comparisons of  
127 these data indicate that this main effect was due, most of time, to a difference between young adults  
128 and the two other groups (see. supp. table 2 for exceptions). In other words, when learning the  
129 position of a goal in a maze surrounded by landmarks, children and older adults travelled, on  
130 average, a longer distance to the goal (travelled distance:  $F_{(39,2)} = 5.58$ ,  $p < 0.01$ , fig. 3b) and it took  
131 them longer to reach the goal (escape latency:  $F_{(39,2)} = 9.29$ ,  $p < 0.001$ , fig. 3c). To go further in the  
132 analysis, we separated the trial into an orientation period (which corresponds to the time it took the  
133 subject to start walking after the trial started) and a navigation period (in which the subject walk to  
134 the goal, see Methods). We found out that part of the longer escape latency was due to the fact that

135 older adults took longer to start walking (orientation duration:  $F_{(39,2)}=3.54$ ,  $p<0.05$ , fig. 3d), likely  
136 indicating a lower confidence in taking decision when facing the environment composed of  
137 landmarks. Additionally, the average speed of the subject's trajectory was lower (average speed:  
138  $F_{(39,2)}=4.69$ ,  $p<0.05$ , fig. 3e, but also the normalized speed:  $F_{(39,2)}=3.76$ ,  $p<0.05$ , supp. fig. 4a) and thus  
139 the navigation period was longer ( $F_{(39,2)}=9.22$ ,  $p<0.001$ , supp. fig. 4b). Comparatively, the geometry  
140 version triggered no difference at all (travelled distance:  $F_{(34,2)}=1.58$ ,  $p=0.22$ , fig. 3b; escape latency:  
141  $F_{(34,2)}=1.47$ ,  $p=0.25$ , fig. 3c; orientation duration:  $F_{(34,2)}=0.71$ ,  $p=0.5$ , fig. 3d; average speed:  $F_{(34,2)}=0.32$ ,  
142  $p=0.73$ , fig. 3e; normalized speed:  $F_{(34,2)}=0.87$ ,  $p=0.43$ , supp. fig. 4a; navigation period:  $F_{(34,2)}=1.79$ ,  
143  $p=0.18$ , supp. fig. 4b). Older adults and children thus travelled a similar distance, were as quick to  
144 start walking and to reach the goal zone than young adults, indicating a good level of confidence and  
145 efficient learning capacities when they are exposed to an environment with a geometric polarization.  
146 Additionally, the learning curves seem steeper in the geometry version, probably indicating a one-  
147 shot learning process in our participants.

148 We next wondered whether age influenced the way people explore the environment that could  
149 ultimately explain difficulty in using the landmarks. To do so, we estimated the intersections  
150 between the gaze vector and the virtual environment (see Methods) and we divide this data into 3  
151 potentially informative areas of the environment, i.e. the sky region, the walls and the floor of the  
152 maze. Note that we did not record eye movements in children, hence analyses are restricted to the  
153 adult participants only. Figure 4 shows a double dissociation, with participants in the landmark  
154 version spending a higher proportion of time gazing at the sky regions (where the landmarks stand,  
155  $U=986$ ,  $p<0.0001$ ), whereas people in the geometry version spend more time gazing at the floor  
156 region ( $U=856$ ,  $p<0.0001$ , see supp. fig. 6 for data not averaged over learning trials). The average  
157 time spent on these critical areas of space was about 20% and people gazed to the maze walls for the  
158 remaining 80% of the trial time, independently of the versions considered ( $U=718$ ,  $p=0.57$ ). When  
159 visualizing spatial distribution of gaze intersections, we found out that people tend to look mainly at  
160 the circle landmark that was directly in front of the starting position in the landmark version and in  
161 the crotch area in the geometry version (heatmaps on fig. 4d,e). These critical areas were gazed  
162 during the beginning of the trial (mainly during the orientation period: supp. fig. 7). Importantly,  
163 older adults did not spend less time than young adults gazing to the sky region in the landmark  
164 version ( $U=119$ ,  $p=0.30$ , fig. 4a), suggesting that the incapacity of older adults to use allocentric  
165 strategies relative to landmarks is not related to a default of attention to those landmarks during the  
166 learning process.

167 To verify this point, we further separated our sample into egocenters and allocenters (see  
168 Methods on how we defined these two categories). Figure 5 shows that older egocenters and

169 allocenters spent a similar proportion of time gazing at the sky region during the learning phase  
170 ( $t_{(14)}=0.07$ ,  $p=0.95$ ). During the testing phase, however, we found an increased time spent gazing at  
171 the sky regions in people using an allocentric strategy (about 40% of the trial in both in young and  
172 older adults) whereas the egocenters kept the same level as in the learning phase (20% of the trial,  
173 allocenters vs. egocenters in the older group:  $t_{(14)}=2.24$ ,  $p<0.05$ ). To better describe this data, we  
174 further separated, among dwells directed to the sky, those directed to the circle, square, or star  
175 quadrants (fig. 5c) and estimated this variable over a window of 1s sliding over 15 (orientation  
176 period) and 35 (navigation period) time steps. Figure 5d shows that the young participants involved  
177 in an allocentric strategy gazed at the star quadrant (directly in front of the starting arm during the  
178 probe trials) during the beginning of the trial and this was apparently enough to understand where  
179 they were in maze and where the goal would be, indicating a good knowledge of the environment in  
180 this group. The older adults, although having the same early tendency to look at the star quadrant,  
181 exhibited an additional gaze component to the circle quadrant (fig. 5e), indicating that they might  
182 depend more heavily on the landmark experienced during the learning, that they might use it in a  
183 response-like manner (“to the right of the circle”). Finally, the egocenters in the older group gazed  
184 at the star quadrant (about 30% of the time at the beginning of the trial), but apparently this does  
185 not elicit much in their decision (fig. 5f). Data in the geometry version shows that people using an  
186 allocentric strategy gazed at the floor region early during the probe trials, and no apparent difference  
187 between the behaviour in young or older adults was observed (supp. fig. 8). Given these clear  
188 differences, we next wondered whether we could predict the strategy chosen by the subject by  
189 observing its eye movements. We trained a binary classifier, on a single-subject-single-trial basis,  
190 with the altitude of the gaze, relative to the eye level, averaged during the orientation period of the  
191 probe trials (fig. 6ab) as a predictor variable. To assess the performance of the classifier, we used a  
192 25% hold out validation procedure on 1000 runs of the classifier and a leave-one-out validation (see  
193 Methods). We found that the model could predict which version of the maze the subject was  
194 assigned to by looking at the mean gaze altitude of the subject during the orientation period, i.e.  
195 when the subject did not even start to move in the maze (on 1000 runs:  $P_{(\text{performance}<0.5)} = 0.0001$ ,  
196 leave-one-out: 88% of the subjects were correctly classified,  $n=49$ , fig. 6c). The spatial strategy  
197 chosen by the subject on probe trials could also be predicted, on a single-subject-single-trial basis, by  
198 gaze dynamics (on 1000 runs:  $P_{(\text{performance}<0.5)} = 0.05$ , leave-one-out: 79% of the subjects were correctly  
199 classified,  $n=26$ , fig. 6e), unlike the subject’s age which could not be predicted by gaze dynamic  
200 observation (on 1000 runs:  $P_{(\text{performance}<0.5)} = 0.5$ , leave-one-out: 55% of the subjects were correctly  
201 classified,  $n=49$ , fig. 6d).

202 The additional gaze component to the circle quadrant in the older adults could indicate that  
203 older adults were not using the same process as young ones when employing an allocentric strategy.  
204 Indeed, although our paradigm was dedicated to separate the subject behaviour between allocentric  
205 and egocentric response, ecological navigation cannot be always accounted by such a clear  
206 dichotomy. In other words, a subject using allocentric navigation strategy can nevertheless employ  
207 various subprocesses of varying nature<sup>20</sup>. Figure 7 shows navigation variables, restricted to  
208 participants who employed an allocentric strategy on the probe trials. We found that using an  
209 allocentric strategy in relation to landmarks came at a time cost in older adults. Indeed, two-way  
210 analysis of variance showed a significant interaction between the factors age and version on time-  
211 related variables (normalized escape latency:  $F_{(32,1)}=4.21$ ,  $p<0.05$ , fig 7a; orientation duration:  
212  $F_{(32,1)}=6.95$ ,  $p<0.05$ , fig. 7b; time in central area:  $F_{(32,1)}=8.89$ ,  $p<0.01$ , fig. 7c, but not on the distance-  
213 related variable, normalized travelled distance:  $F_{(32,1)}=0.33$ ,  $p=0.57$ , data not shown). Multiple  
214 comparison indicates that this interaction was due to older adults in the landmark version being  
215 longer to initiate walking, spending a longer time in the central area of the maze (up to 33 seconds in  
216 the first trial in one of our subjects, fig. 7c) and, as a result, being longer than young ones to reach  
217 the goal (supp. tab. 3). In comparison, in using an allocentric strategy in relation to the geometry,  
218 older adults were just as quick as young ones to make their decisions and as fast to reach the goal,  
219 arguing in favour of similar processes used in these two age groups (supp. tab. 3). The qualitative  
220 representations of the subjects' behaviour during the first probe trial (fig. 7d,e) also supports the fact  
221 that older adults might not be using the same processes as young ones when employing an  
222 allocentric strategy, as it is defined by our experimental paradigm. Indeed, we observed that, unlike  
223 young adults, the older adults tended to stop in the central area of the maze and adopt the view  
224 experienced during the learning phase (i.e. gazing in the direction of the red circle), suggesting that  
225 these subjects might be trying to solve the probe trial with a view-matching behaviour rather than a  
226 purely allocentric one.

227 We next wanted to know whether our subjects could be distinguished on visual or cognitive  
228 dimensions. For this analysis, we used the screening tests (see supp. tab. 4 for a detailed description  
229 of these tests) performed by some of our adult participants (up to  $n=48$ , depending on the test) in  
230 the Silversight cohort framework. We first used a principal component analysis (fig. 8a) in order to  
231 differentiate global visuo-cognitive profiles in our subjects. We found out that subjects could be  
232 discriminated on the first component based on their age (young vs. older participants:  $U=55$ ,  
233  $p<0.0001$ ) but also, among the older groups, based on the strategy they used during the probe trials  
234 (allocentrers vs. egocentrers in the old group:  $U=117$ ,  $p<0.01$ ). When assessing the performance of  
235 subjects on each individual screening test, we found, here as well, a significant age effect on almost



236 all tests (“Age effect” on fig. 8b). We also assessed, among the older group of subjects, whether  
237 visuo-cognitive functions differed between subjects who performed the landmark version or the  
238 geometry version (“Version effect”, on fig. 8b). This control was made to ensure that our sample was  
239 a priori homogeneous, and that an uneven distribution of visuo-cognitive profiles between the two  
240 versions of the maze could not explain our principal result, i.e. that older are better to use allocentric  
241 strategies in relation to geometric cues. We did not find any significant version effect in the older  
242 group (all  $p > 0.1$ ). Next, we wanted to compare profile of allocenters and egocenters, in the old  
243 group (“Choice effect” in fig. 8b). We found that egocenters had lower capacity in terms of  
244 perspective taking ( $t_{(24)}=2.63$ ,  $p < 0.05$ , fig. 8c), mental flexibility ( $U=167$ ,  $p < 0.05$ , fig. 8d) and contrast  
245 sensitivity, especially at high frequencies (fig. 8e, 0.5 circle per degree (CPD):  $t_{(21)}=1.87$ ,  $p=0.08$ ; 1  
246 CDP:  $t_{(21)}=0.48$ ,  $p=0.63$ ; 2 CDP:  $t_{(21)}=2.11$ ,  $p < 0.05$ ; 4 CDP:  $t_{(21)}=2.37$ ,  $p < 0.05$ ; 8 CDP:  $t_{(21)}=2.39$ ,  $p < 0.05$ ;  
247 16 CDP:  $U=101$ ,  $p < 0.001$ ), when compared to allocenters. Two-sample comparisons were also close  
248 to significance for the tests assessing 3d mental rotation ( $U=248$ ,  $p=0.065$ ) and working memory  
249 functions ( $U=249$ ,  $p=0.0501$ , see complete data in supp. figs. 9 and 10). In other words, having a  
250 lower capacity to perceive fine details and lower executive and visuo-spatial abilities seems to be  
251 associated with a decrease usage of allocentric strategies.

252 Finally, a subset of subjects ( $n=20$ , 7 older adults and 13 children) performing the landmark  
253 version was asked, at the end of the experiment, to recognize the maze shape (among 3 possibilities,  
254 supp. fig. 11a), the landmarks (among 6 possibilities, supp. fig. 11b) and to draw a top-view map of  
255 maze they experienced. For the drawings, we assessed whether the constellation order was correct  
256 (supp. fig. 11c for a counterexample), the landmarks positioned correctly relative to the maze (supp.  
257 fig. 11d for a counterexample) and finally whether the goal zone was placed correctly relative to the  
258 landmarks. We found that the majority of subjects were capable to recognize the correct shape  
259 (85%) and the landmarks (100%) that they have seen during the experience. When drawing the map,  
260 however, approximately half of the subjects were not capable to remember the correct constellation  
261 order (45%), had a wrong landmark positioning (45%) and, as result, the goal positioning relative to  
262 landmarks was incorrect (65%, supp. fig. 11e). Interestingly, among the subjects who did at least one  
263 error on the drawing, 11 out 15 used an egocentric or return strategy in the testing phase, likely  
264 indicating that the landmarks are not bounded correctly to the representation of space, in those  
265 subjects.

## 266 **Discussion**

267 By testing the navigation strategies used by subjects of three age groups in a maze composed of  
268 either landmarks or geometric cues, this study provides an evidence that geometric cues potentiate

269 the use of allocentric strategies in children (~10 yo) and older adults (>65 yo). When landmarks were  
270 the only source of information that could be used to define locations allocentrically, we observed a  
271 preference for egocentric strategies at both ends of the life course, forming an inverted-profile of  
272 strategies usage across the lifespan. When geometric cues could be used however, the pattern of  
273 results changed drastically. The proportion of spontaneous use of allocentric strategies significantly  
274 increased in both children and older adults, reaching the same level as young adults. By analysing in  
275 detail the behaviour of our subjects (head motion and gaze dynamics), we have shown that learning  
276 locations in an environment composed of landmarks solely was already more problematic in children  
277 and older adults, independently of the strategy preference. This age-related incapacity to use land-  
278 marks was not due to a default of attention, given that future egocenters and allocenters spent a  
279 similar proportion of time gazing at landmarks during the learning process. In the few older  
280 participants still capable to employ an allocentric strategy in relation to landmarks, our results  
281 indicate that the implementation of the strategy came at a large time cost, and that these subjects  
282 might be using one the three landmarks in a response manner ("to the right of"). We observed that  
283 egocenters, although gazing at the landmarks, failed to use them to define locations. This was  
284 probably due to the fact that landmarks are not bounded correctly to the representation of space,  
285 early in development and with advancing age. We have found that providing geometric cues  
286 eliminates age differences in all the variables we observed: older adults and children were very  
287 efficient to learn locations in the environment geometrically polarized, and they were just as quick as  
288 young adults at making decisions and at implementing the strategy. This result indicates that older  
289 adults and children might not be as bad navigators as previously thought if geometric cues are  
290 available. Confirming previous results in real-world condition<sup>18</sup>, our results show that geometry is  
291 visually extracted by gazing at the floor, in a virtual environment as well.

292 Confronting our data with the existing literature allow us to confirm the preference for  
293 egocentric strategies in older adults, when the environment layout does not provide a geometric  
294 polarizing information and when performance, therefore, is based on landmarks only (using the Y-  
295 maze paradigm or others<sup>7-12</sup>). Regarding development, we complement previous evidence by  
296 showing a spontaneous preference for egocentric strategies in 10-year-old children when learning of  
297 a single stimulus-response association is required (as opposed to the more complex maze<sup>6</sup>). We add  
298 that this age-related strategy preference is not related to sensory restriction due to most-often used  
299 desktop virtual reality, given that our subjects show the same behaviour with an immersive head-  
300 mounted display, allowing both proprioceptive and vestibular information to be experienced during  
301 navigation. In addition, we proposed a divergent interpretation of this data, whereby the preference  
302 for an egocentric strategy observed in previous studies was actually conditioned by the sensory cues



303 present in the environment (i.e. an issue with landmark processing) rather than a strategic choice per  
304 se. This interpretation fits well with other data showing that estimating and reproducing distances  
305 and rotations was relatively poor in older adults when the visual environment was composed of a  
306 circular (thus unpolarized) arena<sup>21</sup> and that performance did not increase when landmarks were  
307 provided<sup>22</sup>. Our data fits also with paradigms of route learning, whereby retrieval of the contextual  
308 information (spatial position<sup>23</sup> and/or temporal order<sup>24,25</sup>) about landmarks is impaired in older  
309 adults. The fact that free recall for landmarks was preserved in those studies is also confirmed by  
310 present results. In the light of the current study, we question whether path integration performance  
311 and route learning in large environments would be better in older adults and children when  
312 polarized layouts are used.

313 Altogether, our results suggest a critical function of geometry for orientation and navigation  
314 across the lifespan, which allows people of all age to quickly understand the layout, their own  
315 position within it and learn specific locations in space. Reference to geometry could thus represent a  
316 sort of default mode for spatial representation, which is well preserved across the lifespan, whereas  
317 landmark-based representation is developed at adult age. It may also require an additional cognitive  
318 effort for landmarks to be bounded to space representation. Our findings highlight the necessity to  
319 rethink the impact of age on spatial cognition and reframe the classical allocentric/egocentric  
320 dichotomy in order to integrate a landmark/geometry opposition that better explain age-dependent  
321 navigation deficits. It remains to be understood what makes geometry special relative to landmark  
322 and why we observe an age-related failure in anchoring the "cognitive map" with respect to  
323 landmarks. One possibility is that different sub-networks in the brain mediate the processing of  
324 geometric and landmark cues and that the sub-network dedicated to geometric processing is  
325 matured earlier in development and better preserved in aging. Experiments in our group are on-  
326 going in order to differentiate the brain areas implicated in geometry vs. landmark processing in  
327 humans, and characterize age-related cortical and sub-cortical dysfunctions potentially explaining  
328 why older adults and children are better at using allocentric strategies in the presence of geometric  
329 cues.

## 330 **Methods**

### 331 **Participants**

332 Seventy-nine subjects were included in this study: 29 children (range: 10-11 yrs,  $\mu=10$ ,  $\delta=0.49$ ,  
333 17 females, 12 males), 22 young adults (range: 23-37 yrs,  $\mu=28$ ,  $\delta=4.28$ , 13 females, 9 males) and 28  
334 older adults (range: 67-81 yrs,  $\mu=73$ ,  $\delta=3.90$ , 17 females, 11 males). The adult participants were part

335 of the SilverSight cohort population (~350 enrolled subjects) at the Vision Institute - Quinze-Vingts  
336 National Ophthalmology Centre, in Paris. The child participants were recruited in a primary school in  
337 the Paris area. All participants were voluntary and gave informed consent (parents gave informed  
338 consent for their child). The procedures were performed in accordance with the tenets of the  
339 Declaration of Helsinki, and they were approved by the Ethical Committee CPP Ile de France V  
340 (ID\_RCB 2015-A01094-45, No. CPP: 16122 MSB). Adult participants were included in the study based  
341 on the following criteria: *i*) corrected visual acuity of at least 7/10, or 5/10, in participants younger or  
342 older than 70 years, respectively; *ii*) a Mini-Mental State Examination score of 24 or higher; *iii*) no  
343 physical inability in terms of locomoting without assistance (the complete list of inclusion/exclusion  
344 criteria used for the Silversight cohort are described in supp. tab. 5). The clinical and functional  
345 assessment of the Silversight cohort involved: ophthalmological screening (e.g., optical coherence  
346 tomography, fundus photography), functional visual screening (e.g., visual acuity, visual field extent,  
347 contrast sensitivity, attentional field of view), otorhinolaryngological examination (e.g., audiogram,  
348 vestibular function), cognitive-neuropsychological assessment (e.g., visuo-spatial memory, mental  
349 rotation, executive functions), oculomotor evaluation (e.g., ocular fixation, saccadic control), and a  
350 static/dynamic balance assessment. Among this multivariate assessment, we selected a subset of  
351 screening tests in order to control, as much as possible, for multiple co-factors at stake during spatial  
352 cognition, possibly entailing an unbiased interpretation of spatial behavioral data (e.g., with respect  
353 to inter-individual variability). These screening tests evaluated visual functions (contrast sensitivity at  
354 different spatial frequency) and cognitive functions (memory and executive functions, visuo-spatial  
355 abilities), which are detailed in supplementary figure 4. Participants habitually wearing far-vision  
356 lenses were encouraged to keep their glasses on during the experiment.

## 357 **Material**

358 The experiment with the adult participants was performed in the Streetlab platform at the  
359 Institute of Vision and in a school gymnasium with the children participants. The virtual reality (VR)  
360 environment was created using the Unity3D game engine (Unity Technologies) and displayed in a  
361 HTC VIVE headset equipped with a Tobii Pro VR binocular eye tracker. Participants were equipped  
362 with a VR capable backpack computer (VR One, MSI). Experiment control and monitoring were  
363 performed remotely. This equipment allows the participant to move freely and explore the virtual  
364 environment with a feeling of immersion.

365 The real head position was tracked at 30 Hz by two laser emitters placed 9 m away from each  
366 other and at a height of 3 m allowing an experimental capture area of approximately 4.0 x 4.0 m. The  
367 HTC VIVE display had a nominal field of view of about 110° through two 1080 x 1200 pixels displays,

368 updated at 90 Hz. The pixel density of the display was about 12 pixels/degree. The Tobii eye-tracker  
369 recorded eye movements at a rate of 120 Hz. The material used with the child participants was the  
370 same as for adults, with the difference that we did not use the Tobii eye-tracking integration with the  
371 children.

## 372 **Virtual environments**

373 The two versions of the Y-maze were composed of 3 corridors, with walls covered by a non-  
374 informative homogeneous texture. The height of the walls was adapted to be 10 cm taller than the  
375 subject's height, in order for all the subjects to have to exact same visual experience. In the landmark  
376 condition, the Y-maze had equiangular arms separated by 120° (fig. 1a). Each corridor was 66 cm  
377 large and 190 cm long. Three distal landmarks were placed outside of the maze, that is 8m above the  
378 walls and 20m from the centre of the maze. These were a green star, a blue square and a red circle,  
379 each subtending a visual angle of 10° relative to the centre of the maze. In the geometric condition,  
380 the geometric polarization of the maze was achieved by an anisotropic arrangement of the 3 arms,  
381 with the angle between arms being 155° for two sides and 50° for the last one. Each corridor was 66  
382 cm large and 230 cm long and there were no distal landmarks in this condition. The corridors were  
383 longer in the geometric condition to prevent the subject from seeing the end of corridors when  
384 starting from any location. The maze was 1.54 times larger in the geometric condition with respect to  
385 the landmark condition. Subjects were randomly assigned to the landmark or geometry condition but  
386 we ensured an equal distribution of gender throughout the two groups. There were no shadows and  
387 the sky was homogeneous. Supplementary results 1 and supplementary figure 1(a-c) show that the  
388 performance of young adults between the geometry version and the landmark version were similar,  
389 arguing in favour of an equivalent level of difficulty in the two versions.

## 390 **Protocol**

391 The experiment lasted 30min approximately and started with the calibration of the eye-tracking  
392 device. After adjusting the headset's position and the inter-pupillary distance, the subjects  
393 performed a nine-points calibration without moving their head. To ensure the quality of the  
394 calibration procedure, a validation of the same nine points was performed. Whenever the mean  
395 angular error of the calibration was above 3°, the calibration process was started over. Validation  
396 (and recalibration if required) was performed at the beginning, halfway through and at the end of  
397 the experiment. During the experiment, the subject was disoriented before each trial. This procedure  
398 required the subject to hold the experimenter's hands and be passively led around the room with  
399 eyes closed. A non-informative sound was display in headphones during the disorientation procedure  
400 to mask potentially uncontrollable sound from outside of the experimental room. We controlled that

401 the disorientation procedure was truly effective by asking the subject to try pointing towards a  
402 computer, which was at the exit of the experimental room. Once disoriented, subjects were  
403 positioned at one of three starting positions (position A, B and C on Fig. 1), facing the center of the  
404 maze. At the end of each trial, the image displayed in the headset faded and the subject was  
405 instructed to close their eyes. Furthermore, the subject was told that walking through the virtual  
406 walls and standing on tiptoes were forbidden. The experiment proceeded as follows: during the  
407 “exploration phase”, the subject went through 3 exploration trials, of 60 seconds each, starting from  
408 one of the three starting positions (fig. 1, areas A, B and C). There was no specific task during these  
409 trials. The participant was instructed to explore the whole environment. Whenever the subject did  
410 not explore one of the corridors or did not look up in the direction of the landmarks, the  
411 experimenter gave a prompt by saying: "Make sure to explore the whole environment". During the  
412 “learning phase”, the subject had to find a goal that triggered a rewarding sound. The goal was  
413 located at the end of corridor on the right (fig. 1, area C with dashed line which was 0.4m of radius).  
414 The starting location (fig. 1, area A) was the same throughout the learning phase. The subject was  
415 instructed to navigate as directly as possible to the goal zone. The learning phase ended after 4  
416 consecutive successful trials, which were defined as a trajectory going directly to the goal zone  
417 without entering the corridor on the left. Then, during the “testing phase”, the subject was  
418 instructed to return to the goal zone and warned that there would be no rewarding signal this time.  
419 The starting position during these trials was changed, unknown to the subject, and followed the  
420 same pseudo-random order across subjects. The predefined order of starting location areas was: B,  
421 A, A, B, A, B. Trials starting from position B were the “probe trials”. Trials starting from A were the  
422 “control trials”, not analysed here. For the testing phase, the trial ends automatically when the  
423 subject stops for at least 5seconds in one of the three possible areas (A, B or C). At the end of the  
424 experiment, a subset of subjects (n=20) performing the landmark version was asked “subsidiary  
425 questions” by the experimenter. They were asked to *i*) indicate the shape of the maze they  
426 experienced among 3 different possibilities (supp. fig. 11a), *ii*) the landmarks that they noticed during  
427 the experiment between 6 possibilities (supp. fig. 11b), and *iii*) to draw a top-view map of maze they  
428 experienced (including walls, landmarks and goal position).

## 429 **Data processing**

430 We first removed the two first seconds of recording, before which no image was displayed in the  
431 HMD. Then, we interpolated the head position (30 Hz) to fit the format of the eye-tracker data (120  
432 Hz). The trial time was separated into an orientation period and navigation period. The orientation  
433 period starts when the image is displayed in the HMD until movement initiation, which is defined as  
434 the moment the subject surpasses a virtual circle of 0.3m around the starting position. The

435 navigation period lasts until the subject enters the goal area (during the learning phase) or one of the  
436 three areas (A, B or C during the testing phase). Concerning the eye-tracking data, we estimated a  
437 cyclopean gaze vector by averaging data from the left and the right eye. If the signal from one eye  
438 was judged too noisy, by visual inspection, we used the data from the second eye. When then  
439 calculated the intersection of the gaze vector with 3 main environment plans: the walls, the floor and  
440 the sky region. For the later, we intersected the vector with a virtual sphere with a radius of 6m  
441 around the maze centre.

442 The navigation strategy was defined as the first area (A, B, C) entered by the subject on the  
443 probe trials. Whenever the subject first entered the actual goal location (fig. 1, area C with the  
444 dashed line), he/she was classified as using an allocentric strategy for that particular trial. Otherwise,  
445 if the subject represents the goal position relative to his own body position, he would navigate to  
446 area A and be using an egocentric strategy for that trial. Finally, the subject could also to return to  
447 the starting arm (B). This third, less observed possibility was termed a return strategy. We further  
448 separate our sample of subjects into “allocentrers” and “egocentrers” based on their choices on the  
449 probe trials. If a subject had a majority of allocentric or egocentric choices (2/3 or more), he/she was  
450 classified as allocentrer or egocentrer, respectively. Supplementary table 1 summarizes the number  
451 of observations and the mean and standard deviation of age in these two categories. Note that there  
452 were one children and one older subject who returned to the starting position on 2/3 or more probe  
453 trials (i.e. returning to area B) in the landmark version. Those two subjects are excluded from the  
454 analyses comparing allocentrers and egocentrers.

455 Several navigation variables were estimated, based on the trajectory of head positions, recorded  
456 by the HMD. Navigation performance was evaluated through several navigation variables. First, the  
457 number of trial needed to reach the learning criterion corresponded to the number of trials until  
458 reaching 4 consecutive trials where the subject goes directly to the goal area in the right arm,  
459 without entering the left arm (minimum: 4 trials). The escape latency and the travelled distance  
460 measured the time (in seconds) and distance (in meters) until reaching the goal zone. Given that the  
461 geometric version of the maze was slightly longer than the landmark one, we further normalized  
462 these two variables by the maze length. We also estimated the duration of the orientation period  
463 (from trial start until movement initiation, see definition above), the navigation period (from  
464 movement initiation until reaching the goal zone), and the time spent in the central area. The central  
465 area encompassed the last third of the three arms. Finally, we also estimated the average  
466 instantaneous speed of the trajectory from movement initiation until reaching the goal zone. Given  
467 that the walking speed is influenced by the subject’s height<sup>26</sup> and that children were shorter than the  
468 adult participants, we also normalized the speed by the height.

469 The eye-tracking data were recorded for the adult participants only. The main variable we were  
470 interested to was the dwell time proportion, which corresponds to the proportion of time spent  
471 fixating either the walls, the floor or the sky region, normalized by the duration of the period  
472 considered. Missing data were not taken into account when normalizing this variable. There were, on  
473 average, a proportion of 0.27 and 0.22 missing data in the older group and the young group,  
474 respectively. Among the fixations directed to the sky, we further separated those directed to the  
475 circle, square, or star quadrant (fig. 5c). No particular attempt was made to separate fixations from  
476 saccades. Finally, for spatial distribution representations (i.e. heatmaps), we accumulated the gaze  
477 vector intersections and normalized the maps separately, for each group of subjects considered.

478 We used a generalized linear regression model in order to predict either the version of the maze  
479 the subject performs, his age or the spatial strategy he will employ on the probe trials. We used the  
480 averaged altitude of the gaze relative to eye level (in degrees) during the orientation period as an  
481 predictor variable and the version (i.e. landmark or geometry), the age (i.e. young or older) or the  
482 strategy (i.e. allocentric or egocentric) as binary response. We used two validation procedures: a 25%  
483 hold out validation on 1000 runs of the binary classifier where the trained model was tested on  
484 remaining 25% of the subjects, and leave-one-out validation, where the model was tested on the  
485 remaining subject. The performance of the model was assessed as the proportion or the number of  
486 correctly predicted response. The validation sets included all the three probe trials of a single  
487 subject, meaning that the model was not predicting some trials while being trained on the remaining  
488 trials of a single subject. The strategy was predicted for the subjects performing the landmark version  
489 only. Indeed, only two subjects choose the egocentric option in the geometry version, making it  
490 impossible for the model to learn appropriately.

491 Concerning the subsidiary questions, subjects were asked to recognize the maze shape among 3  
492 possibilities ("shape recognition", supp. fig. 11a,e), the landmarks that were present among 6  
493 possibilities ("landmark recognition", supp. fig. 11b,e) and to draw a top-view map of maze they  
494 experienced. For the scoring of the drawings, three other parameters were evaluated separately.  
495 First, whether the landmark constellation was drawn in the correct order, whatever its position  
496 ("constellation order", supp. fig. 11c,e). Second, whether the positioning of the landmarks was in-  
497 between arms and not at the end of the arm, whatever the constellation order ("landmark  
498 positioning", supp. fig. 11e). Third, if the subject positioned the goal in the correct arm, relative to  
499 the landmarks ("goal positioning", supp. fig. 11e).

## 500 **Statistical analyses**

501       When the data were continuous and when normality and homoscedasticity allowed it, we used  
502 two-sample t-test (when comparing two subgroups), one-way ANOVA (when comparing three  
503 subgroups) and two-way ANOVA (when comparing two factors: age\*version). Normality was verified  
504 by the Lilliefors normality test and visual inspection of Q-Q plots. Box-Cox transformation could be  
505 used to achieve normality and equalize variance<sup>27</sup>. We used two-sample Wilcoxon rank sum test or  
506 Fisher's exact probability test for ordinal data and contingency table, respectively. Alpha level for  
507 statistical significance was set at  $P < 0.05$ .

## 508 **References**

- 509 1. Burgess, N. Spatial cognition and the brain. *Ann. N. Y. Acad. Sci.* **1124**, 77–97 (2008).
- 510 2. Ekstrom, A. D. & Isham, E. A. Human spatial navigation: representations across dimensions  
511 and scales. *Curr. Opin. Behav. Sci.* **17**, 84–89 (2017).
- 512 3. Lester, A. W., Moffat, S. D., Wiener, J. M., Barnes, C. A. & Wolbers, T. The aging navigational  
513 system. *Neuron* **95**, 1019–1035 (2017).
- 514 4. Newcombe, N. S. Navigation and the developing brain. (2019). doi:10.1242/jeb.186460
- 515 5. Nardini, M., Burgess, N. & Breckenridge, K. Differential developmental trajectories for  
516 egocentric, environmental and intrinsic frames of reference in spatial memory. **101**, 153–172  
517 (2006).
- 518 6. Bullens, J., Iglói, K., Berthoz, A., Postma, A. & Rondi-Reig, L. Developmental time course of the  
519 acquisition of sequential egocentric and allocentric navigation strategies. *J. Exp. Child Psychol.*  
520 **107**, 337–350 (2010).
- 521 7. Colombo, D. *et al.* Egocentric and allocentric spatial reference frames in aging: A systematic  
522 review. *Neurosci. Biobehav. Rev.* **80**, 605–621 (2017).
- 523 8. Wiener, J. M., de Condappa, O., Harris, M. a & Wolbers, T. Maladaptive bias for  
524 extrahippocampal navigation strategies in aging humans. *J. Neurosci.* **33**, 6012–7 (2013).
- 525 9. Bohbot, V. D. *et al.* Virtual navigation strategies from childhood to senescence: evidence for  
526 changes across the life span. *Front. Aging Neurosci.* **4**, 28 (2012).
- 527 10. Davis, R. L. & Weisbeck, C. Search Strategies Used by Older Adults in a Virtual Reality Place  
528 Learning Task. *Gerontologist* **55**, S118–S127 (2015).
- 529 11. Driscoll, I., Hamilton, D. A., Yeo, R. A., Brooks, W. M. & Sutherland, R. J. Virtual navigation in  
530 humans: The impact of age, sex, and hormones on place learning. *Horm. Behav.* **47**, 326–335  
531 (2005).



- 532 12. Rodgers, M. K., Sindone, J. A. & Moffat, S. D. Effects of age on navigation strategy. *Neurobiol.*  
533 *Aging* **33**, 997–1003 (2012).
- 534 13. Ruggiero, G., D’Errico, O. & Iachini, T. Development of egocentric and allocentric spatial  
535 representations from childhood to elderly age. *Psychol. Res.* **80**, 259–272 (2016).
- 536 14. Harris, M. A., Wiener, J. M. & Wolbers, T. Aging specifically impairs switching to an allocentric  
537 navigational strategy. *Front. Aging Neurosci.* **4**, 1–9 (2012).
- 538 15. Moffat, S. D. Aging and spatial navigation: what do we know and where do we go?  
539 *Neuropsychol. Rev.* **19**, 478–89 (2009).
- 540 16. Lithfous, S., Dufour, A. & Després, O. Spatial navigation in normal aging and the prodromal  
541 stage of Alzheimer’s disease: insights from imaging and behavioral studies. *Ageing Res. Rev.*  
542 **12**, 201–13 (2013).
- 543 17. Raz, N., Rodrigue, K. M., Head, D., Kennedy, K. M. & Acker, J. D. Differential aging of the  
544 medial temporal lobe: a study of a five-year change. *Neurology* **62**, 433–438 (2004).
- 545 18. Bécu, M. *et al.* Age-related preference for geometric spatial cues during real-world navigation.  
546 *Nat. Hum. Behav.* (2019).
- 547 19. Hermer, L. & Spelke, E. A geometric process for spatial reorientation in young children. *Nature*  
548 (1994).
- 549 20. Ekstrom, A. D., Huffman, D. J. & Starrett, M. Interacting networks of brain regions underlie  
550 human spatial navigation : a review and novel synthesis of the literature. *J. Neurophysiol.* **118**,  
551 3328–3344 (2017).
- 552 21. Mahmood, O., Adamo, D., Briceno, E. & Moffat, S. D. Age differences in visual path  
553 integration. *Behav. Brain Res.* **205**, 88–95 (2009).
- 554 22. Harris, M. a & Wolbers, T. Ageing effects on path integration and landmark navigation.  
555 *Hippocampus* **22**, 1770–1780 (2012).
- 556 23. Jansen, P., Schmelter, A. & Heil, M. Spatial knowledge acquisition in younger and elderly  
557 adults: A study in a virtual environment. *Exp. Psychol.* **57**, 54–60 (2010).
- 558 24. Head, D. & Isom, M. Age effects on wayfinding and route learning skills. *Behav. Brain Res.* **209**,  
559 49–58 (2010).
- 560 25. Wilkniss, S. M., Jones, M. G., Korol, D. L., Gold, P. E. & Manning, C. A. Age-related differences  
561 in an ecologically based study of route learning. *Psychol. Aging* **12**, 372–375 (1997).



- 562 26. Samson, M. M. *et al.* Differences in gait parameters at a preferred walking speed in healthy  
563 subjects due to age, height and body weight. *Aging Clin. Exp. Res.* (2001).
- 564 27. Osborne, J. W. Improving your data transformations : Applying the Box-Cox transformation.  
565 *Pract. Assessment, Res. Eval.* **15**, 1–9 (2010).

### 566 ***Acknowledgements***

567 This research was supported by ANR—Essilor SilverSight Chair No. ANR-14-CHIN-0001. The  
568 funders had no role in the study design, data collection and analysis, decision to publish or  
569 preparation of the manuscript. We thank S. Mohand-Said of the Clinical Investigation Centre of the  
570 Quinze-Vingts Hospital, Paris, for medical supervision during clinical screening of participants. We  
571 also thank K. Lagrené, from the Aging in Vision and Action laboratory at Vision Institute, for helping in  
572 enrolling/profiling the participants. Finally, the authors wish to thank E. Gutman, J. Lebrun and C.  
573 Authié of the Streetlab team for technical support in setting up the experiments in the Streetlab  
574 platform.

### 575 ***Author contributions***

576 M.B., S.R., A.O.L., D.S., A.A. designed the experiment, M.B., A.O.L., S.R., G.T. collected and  
577 analysed the data, M.B., D.S., A.A. wrote the article.

### 578 ***Competing interest***

579 The authors declare no competing interest.

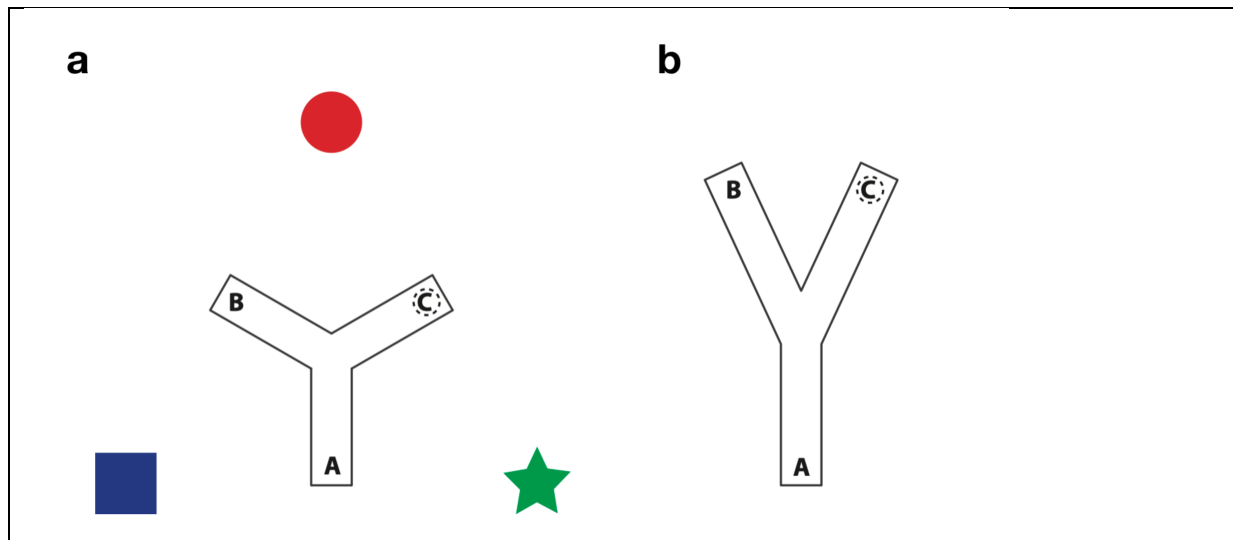

**Figure 1. Two versions of the Y-maze.** In the landmark version (a), the Y-maze had equiangular arms separated by  $120^\circ$ . Three distal landmarks were placed outside of the maze. In the geometry version (b), an anisotropic arrangement of the 3 arms ( $50^\circ/155^\circ/155^\circ$ ) provided the geometric polarization. No distal landmarks were present in this condition. Each subject was randomly assigned to the landmark or the geometric version and the experimental procedure was the same for the two versions. After calibrating the eye-tracking device, the subject explored the environment during 3 trials of 1min each, starting from A, B and C (“exploration phase”). Then, the “learning phase” consisted of several trials where the subject had to learn to navigate as directly as possible to the goal position (dashed area C) while always starting from position A. A rewarding signal was automatically displayed when the subject entered the goal area. After four consecutive successful trials, the “testing phase” consisted of 6 trials where the starting position of the subject was changed, unknown to him/her, in a pseudo-random manner: three trials (termed “probe trials”) started from B and 3 trials (termed “control trials”) started from A. No rewarding sound was provided during this phase. During the probe trials, if the subject used the distal landmarks or the geometric polarization to navigate to the actual goal position (C), he is using an allocentric strategy for that particular probe trial. Otherwise, if he keeps on turning right to position A, the subject is using an egocentric strategy, representing the goal position relative to his/her own body position. Participants were disoriented before each trial of the experiment.

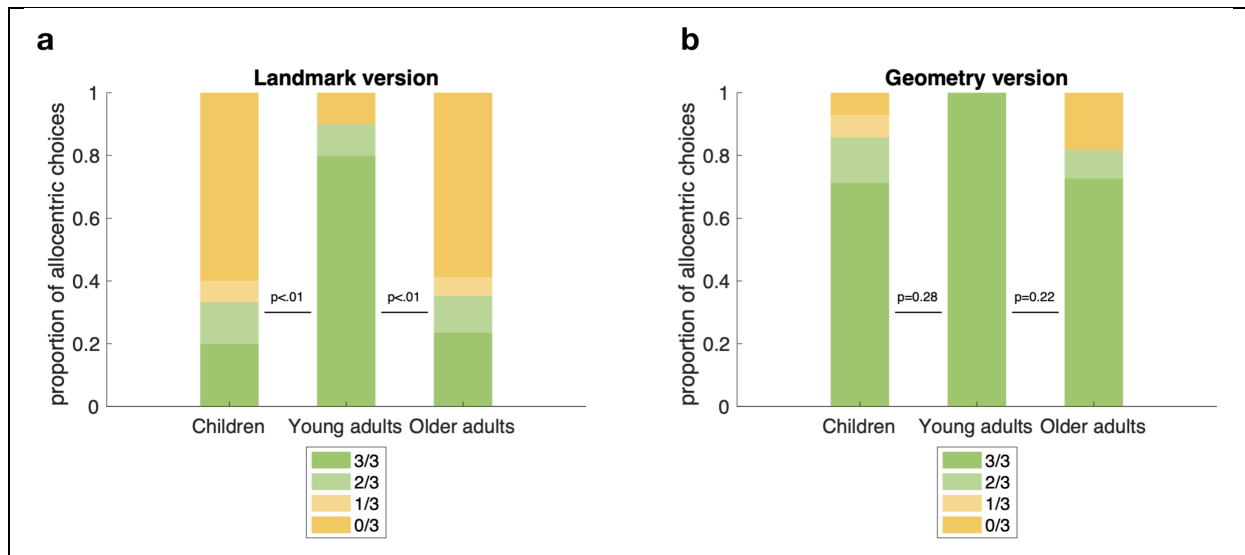

**Figure 2. Proportion of allocentric choices in the three probe trials in the landmark (a) and the geometry (b) versions, for the three age groups.** In the landmark version ( $n=42$ ), we observe an inverted U-profile of allocentric strategy use related to age, with children and older adults being significantly less likely to use an allocentric strategy in this version, relative to young adults. We observed no age difference in the geometry version ( $n=37$ ), supporting the fact that children and older adults depend on the presence of geometric cues to be able to use allocentric strategies as young adults. P-values on the graph indicate Fisher's exact probability test for two categories: majority of allocentric choices (green color: 3/3 and 2/3) and minority of allocentric choices (yellow color: 1/3 and 0/3). Among the later category, two subjects returned to the starting position (i.e. area B) in the landmark version.

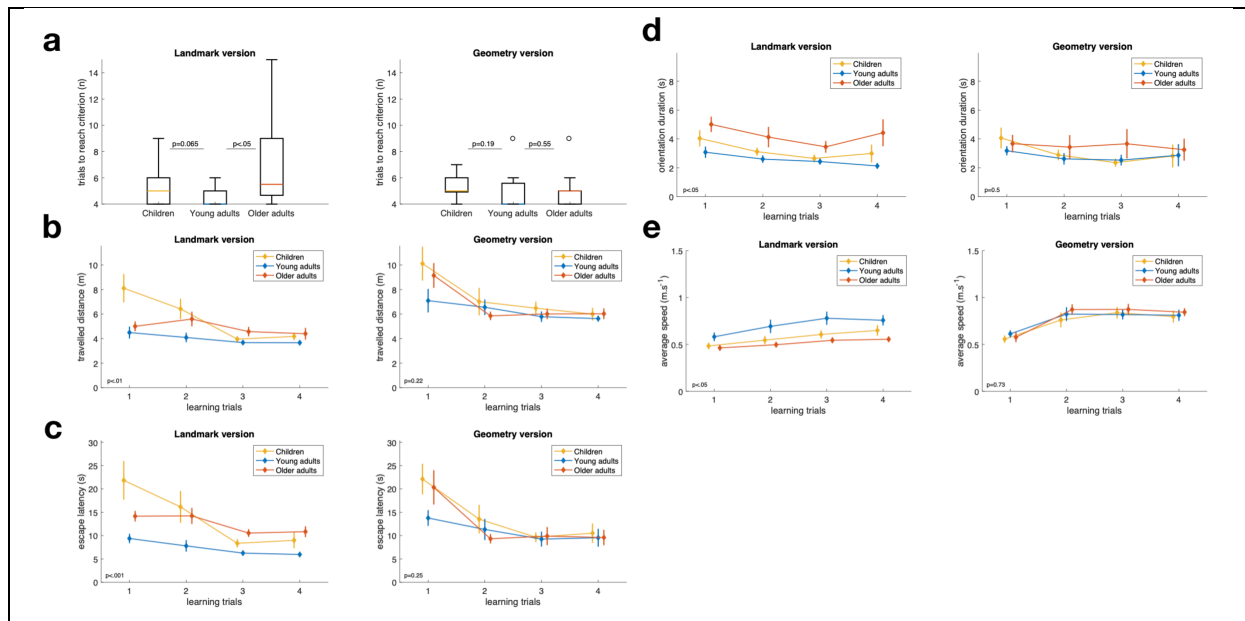

**Figure 3. Spatial navigation performance of the three age groups during the learning phase, in the landmark version (left) and the geometry version (right).** Overall, age differences are significant in the landmark version but not in the geometry version. P-value on the graphs corresponds to two-sample Wilcoxon rank sum test (a) or the main effect of age using one-way ANOVA for data averaged on the four first trial of the learning phase (b-e). Multiple comparisons of these data are provided in supp. table XX. Box plot representations show the median (coloured lines), the interquartile range (25th and 75th percentiles, length of the boxes), 1.5× interquartile range (whiskers) and outliers (circles, not present here). Position offset on the x-axis is added for clarity. Error bars show standard error.

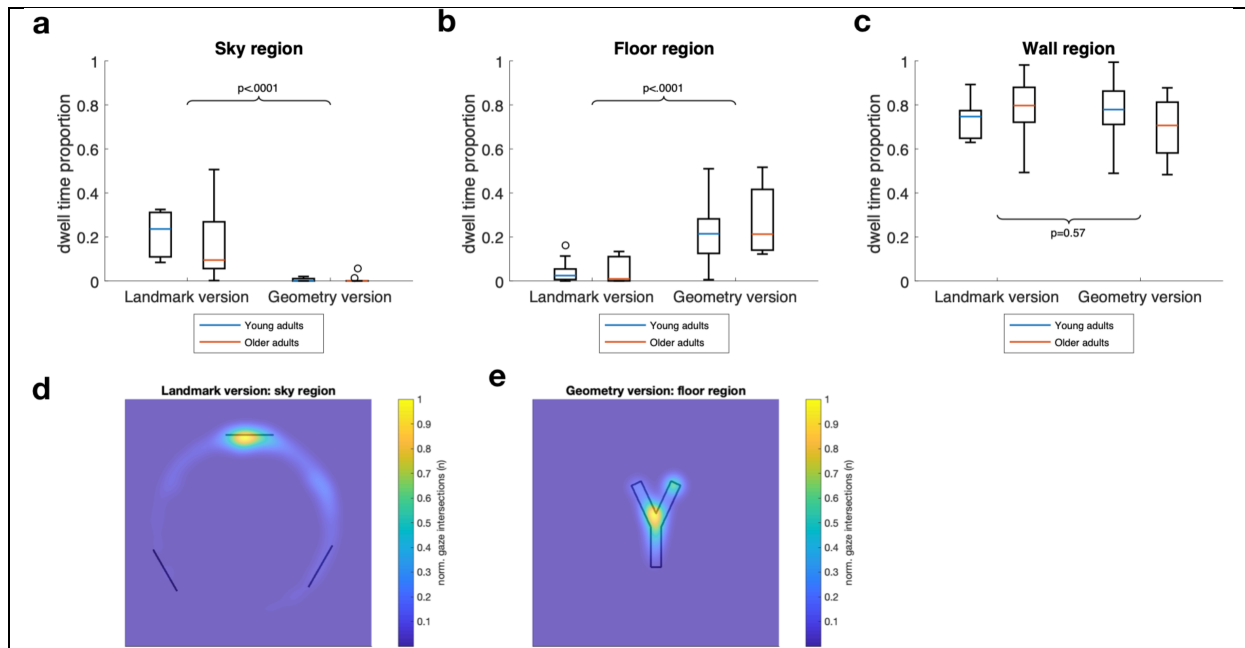

**Figure 4. Dwell time proportion (a-c) and spatial distribution (d,e) of gaze for 3 areas of interest: sky, floor and wall regions.** Participants in the landmark version spent significantly more time gazing to the sky region (particularly the circle landmark) whereas participants in the geometry version spent more time gazing to the floor (particularly the crotch region), independently of age. Data are averaged (a-c) or pooled (d,e) over the first four trials of the learning phase. Normality of dwell time proportion could not be reached, therefore P-values on graphs indicate non-parametric rank sum test comparing the two versions, with data are pooled on the factor age (a-c). Box plot representations (a-c) show the median (coloured lines), the interquartile range (25th and 75th percentiles, length of the boxes), 1.5× interquartile range (whiskers) and outliers (circles). Heatmaps (d,e) data are pooled across age and colorbar normalization is computed for each group separately.

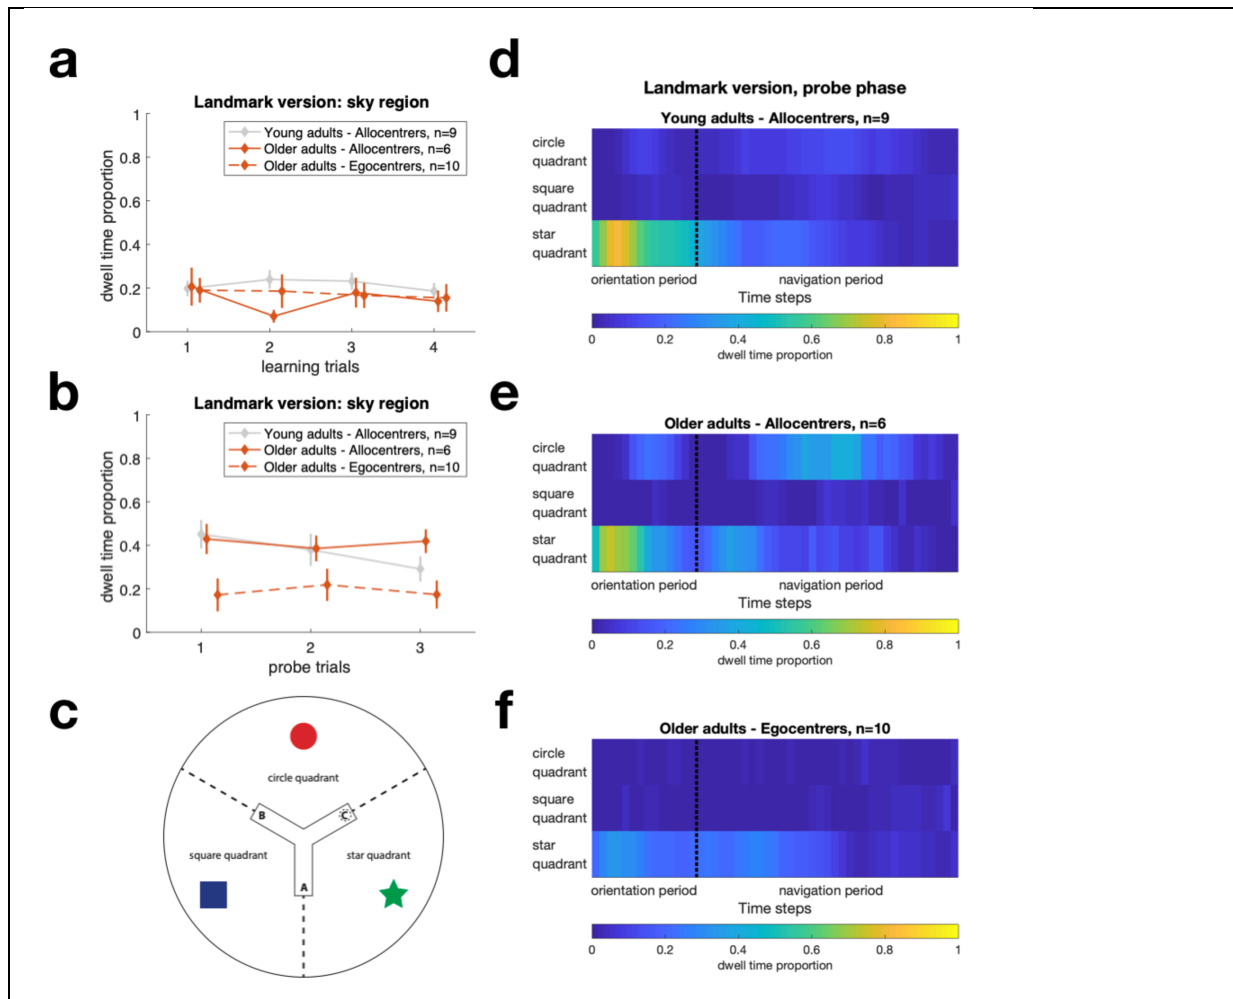

**Figure 5. Gaze dynamics in the landmark version, separately for egocenters and allocenters.**

(a,b) Egocenters did not spend a lower proportion gazing to the landmarks during the learning trials, however, they fail to increase this proportion during the probe trials. Position offset on the x-axis is added for clarity. Data from young allocenters is shown for comparison. Data from young egocenters is not shown, as there was only one subject using an egocentric strategy in this case. Error bars show standard error. (c) This proportion was further separated between the circle, square and star quadrants. (d) Young allocenters looked at the star quadrant (which was in front of the starting arm) during the beginning of the trial (orientation period) and this seemed enough to understand where the actual goal was. (e) Older adults using an allocentric strategy had the same behaviour and show an additional component, gazing the circle quadrant (the one mostly experienced during the learning phase) during the orientation period and in the middle of the navigation period. (f) Older adults preferring the egocentric strategy still gazed at the star quadrant at the beginning of trial, indicating, that the failure to use an allocentric strategy was not due to the fact that landmarks were not noticed.

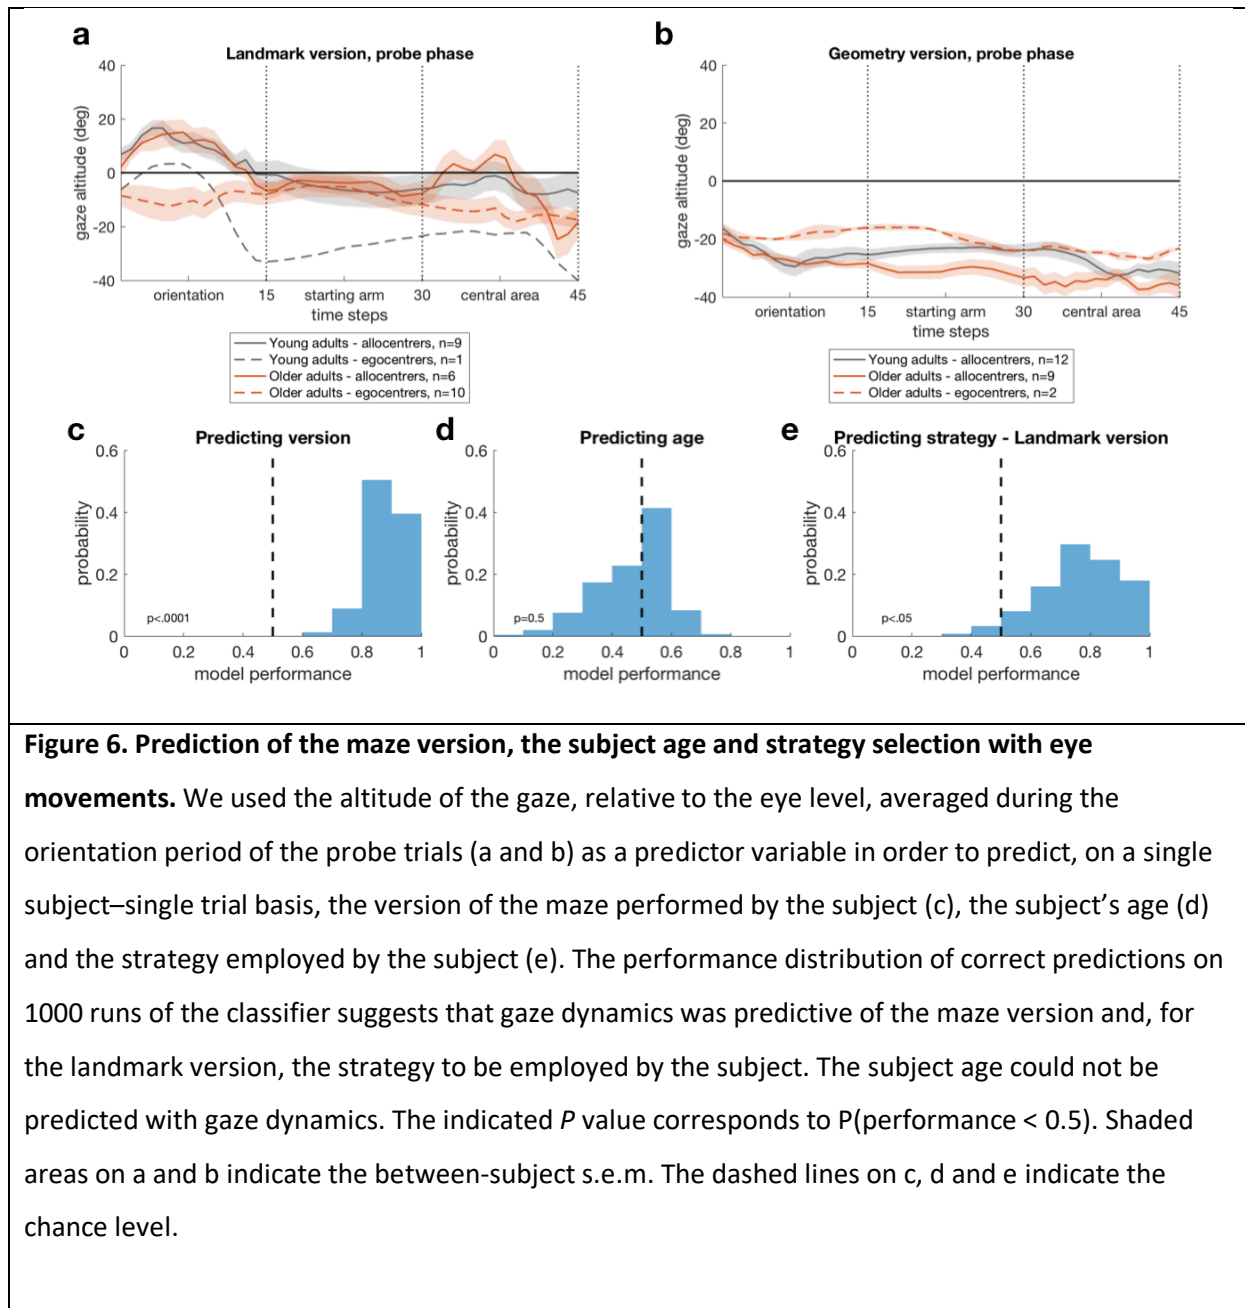

**Figure 6. Prediction of the maze version, the subject age and strategy selection with eye movements.** We used the altitude of the gaze, relative to the eye level, averaged during the orientation period of the probe trials (a and b) as a predictor variable in order to predict, on a single subject–single trial basis, the version of the maze performed by the subject (c), the subject’s age (d) and the strategy employed by the subject (e). The performance distribution of correct predictions on 1000 runs of the classifier suggests that gaze dynamics was predictive of the maze version and, for the landmark version, the strategy to be employed by the subject. The subject age could not be predicted with gaze dynamics. The indicated  $P$  value corresponds to  $P(\text{performance} < 0.5)$ . Shaded areas on a and b indicate the between-subject s.e.m. The dashed lines on c, d and e indicate the chance level.



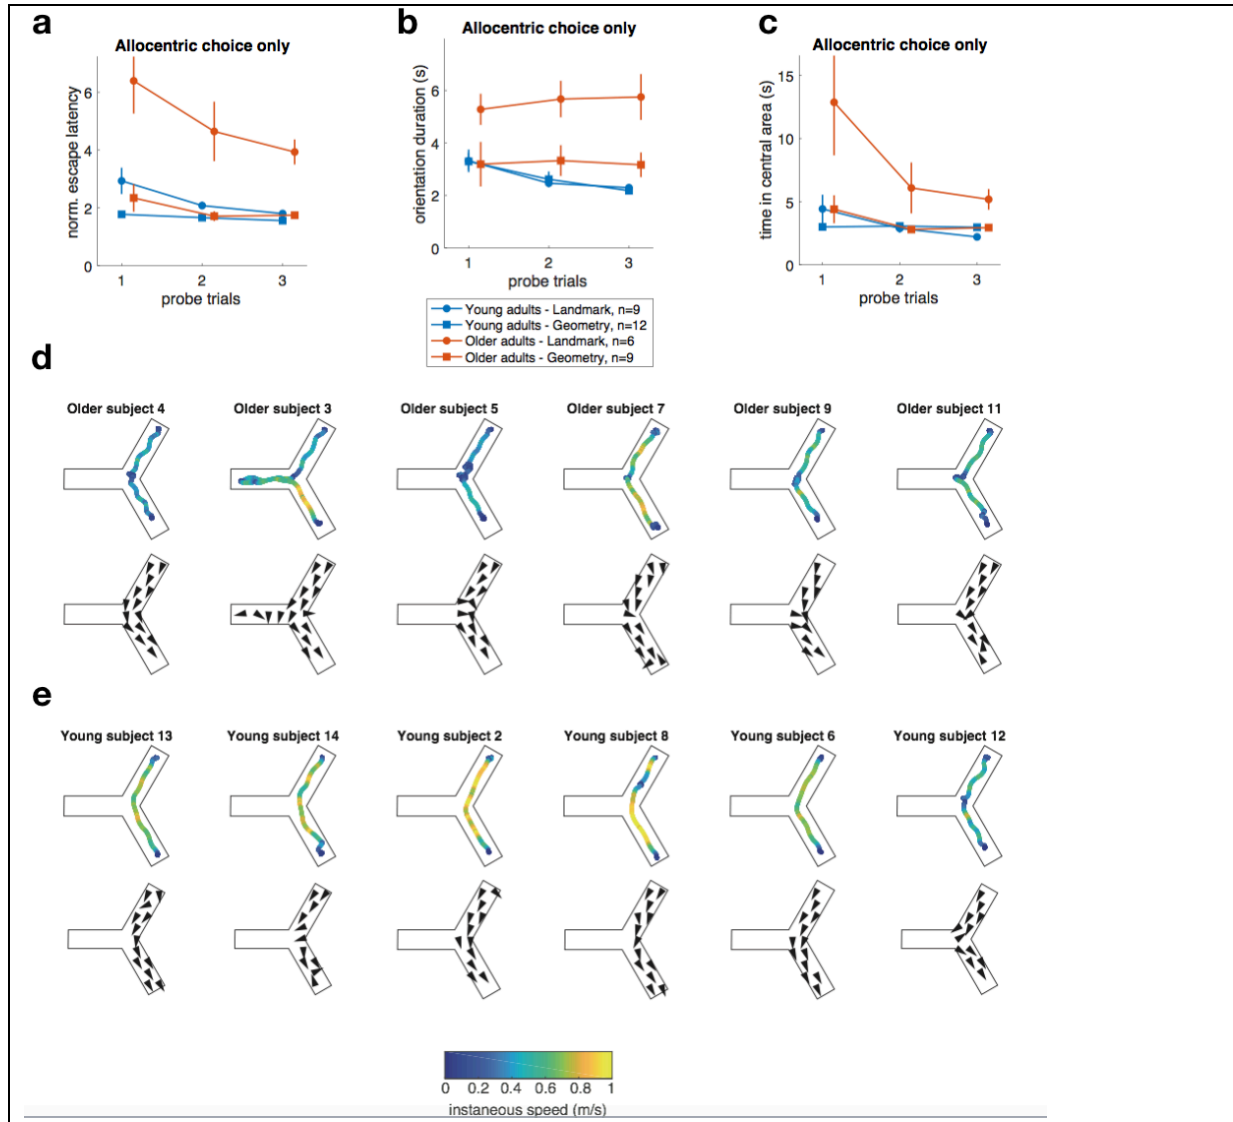

**Figure 7. Different processes used by young and older adults while employing an allocentric**

**strategy during the probe trials.** (a-c) The observed time-related navigation variables suggest that, on one hand, using an allocentric strategy in relation to landmarks comes at a time cost in older adults. On the other hand, older adults are able to use geometric cues allocentrically with the same level of efficiency as young adults. Qualitative representation of the first probe trial in the 6 older adults (d) and 6 young adults (e) capable of using an allocentric strategy, as defined by our paradigm. The top row represents the trajectory and speed of the subject and the bottom row represents the gaze direction. Unlike young adults, older adults slowed down and even stopped in the central area of the maze. When they were in the central area, older adults were also more likely to adopt the view experienced during the learning phase (cf. arrow directed rightward), suggesting a view-matching process in these subjects. The escape latency (a) is normalized to account for the size difference between the two versions of the maze, the two other variables (b,c) can be directly compared between versions. Error bars show standard error.

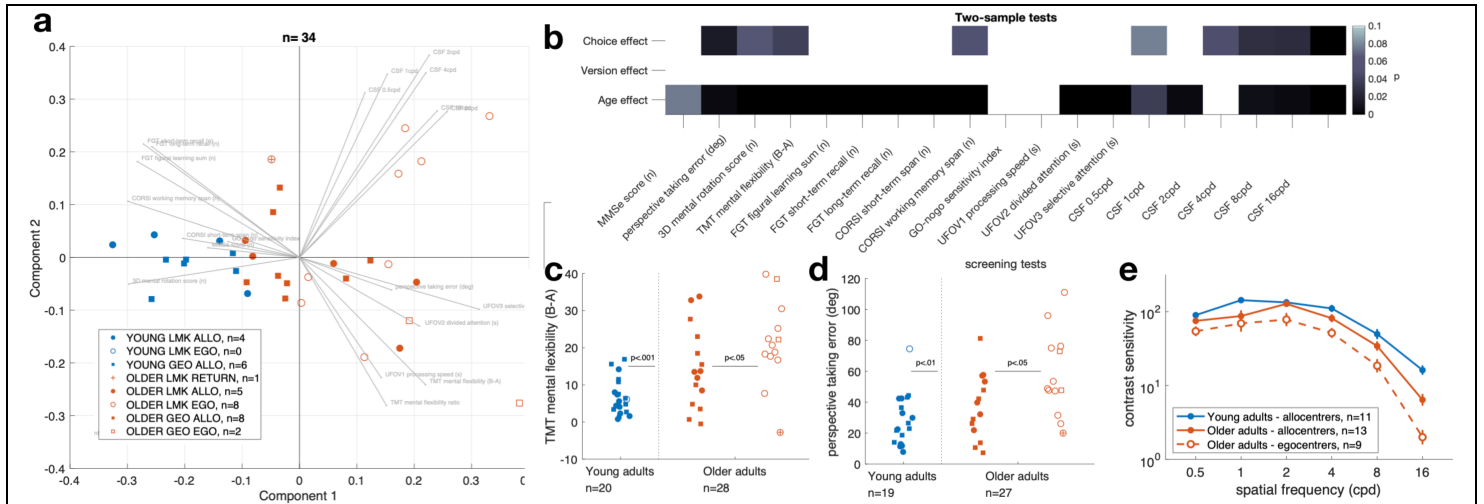

**Figure 8. Visuo-cognitive profile of our participants.** Among the older group, egocenters had lower visual (particularly contrast sensitivity at high spatial frequency) and cognitive functions (particularly executive ones and visuo-spatial abilities), compared to allocenters. Unsurprisingly, age also influenced almost all functions. (a) The principal component analysis combining all screening tests allowed us to discriminate profiles according to age and, in the old groups, according to the strategy used. (b) Overview of two-sample tests and the P-values obtained when comparing the age effect (young adults vs. older adults), the version effect (in the older group, geometry vs. landmark version) and the choice effect (in the older group, egocenters vs. allocenters). The P-values are uncorrected, only the darkest cells would pass correction for multiple comparisons. In the older group, egocenters had lower mental flexibility (c), lower perspective taking capacity (d) and a lower sensitivity to contrast at highest spatial frequency (e). When the variable was continuous and normality of the data was reached, we used t-test. Otherwise, we used Wilcoxon rank sum test when the variable was ordinal. The size of the sample may differ between the analyses presented here. This is due to the fact that not all participants performed all the screening tests of the cohort. An offset is added to the x-axis for clarity (c,d). Error bars show standard error (e). MMSe: mini mental state examination; TMT: trail making test; UFOV: useful field of view; CPD: circles per degree.

## ***Supplementary information***

### ***Supplementary results***

#### **Supplementary results 1:**

##### **Comparing the level of difficulty of the two versions of the maze.**

We reasoned that if the landmark and the geometry versions of the maze had equivalent level of difficulty, we should observe no difference between the two versions in the basic measures of spatial learning in the group of reference, i.e. young adults. We thus considered the number of trials needed to reach the learning criterion (4 consecutive successful trials), the normalized travelled distance and escape latency (taking into account the fact that the two environments had different size) during the learning phase (supp. fig. XX). We found no significant difference in the performance of the young adults in the landmark in comparison to the geometry version on these three variables (trials to reach criterion:  $U=105.5$ ,  $p=0.49$ ; norm. travelled distance:  $U=118$   $p=0.87$ ; norm. escape latency:  $t_{(21,1)}=0.04$ ,  $p=0.84$ ), arguing in favour of a similar level of difficulty between the two versions, at least in young adults.

## Supplementary figures

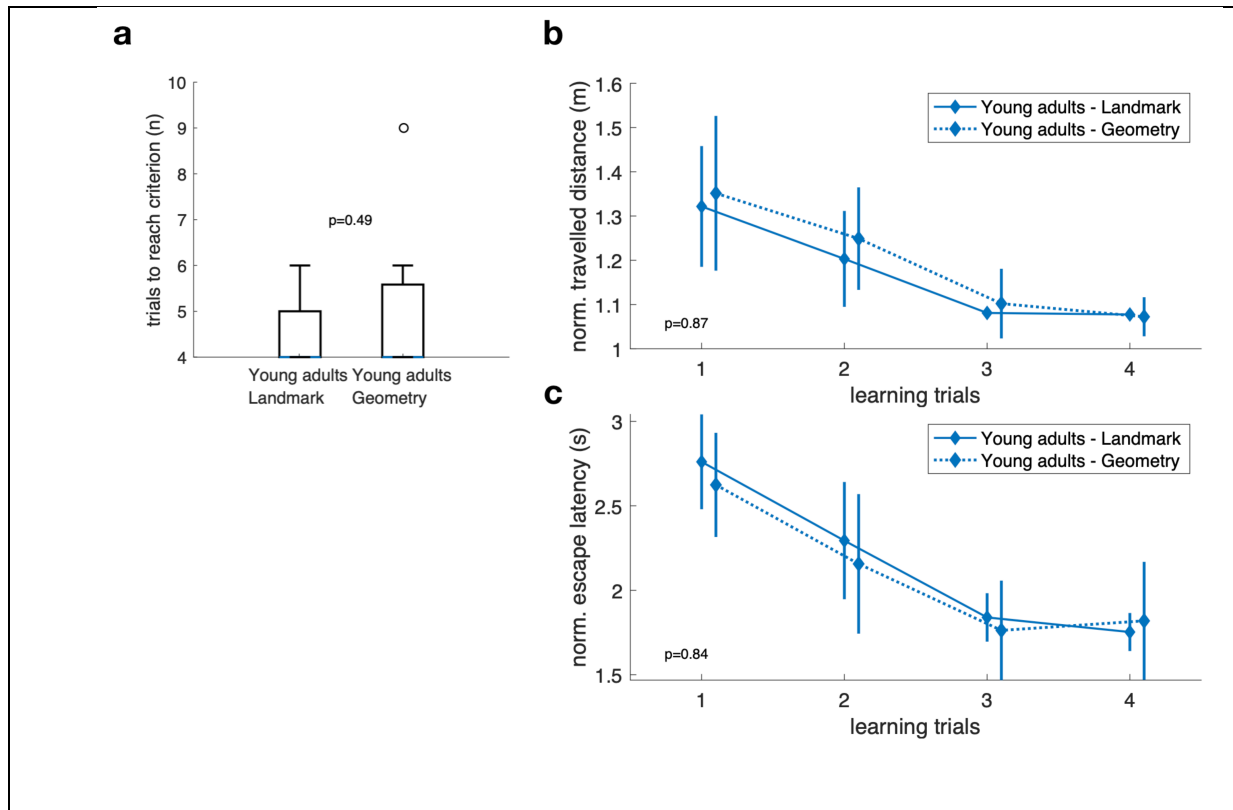

**Supplementary figure 1. Comparing the level of difficulty of the two versions of the maze.** There was no difference in the three basic measure of spatial learning between the two versions, in young adults, arguing in favour of an equivalent level of difficulty between the landmark and the geometry version. The travelled distance (b) and escape latency (c) are normalized to account for the size difference between the two versions of the maze, the number of trials needed to reach the learning criterion (a) can be directly compared between the versions. Data originates from the learning phase. Box plot representations showing the median (coloured lines), the interquartile range (25th and 75th percentiles, length of the boxes), 1.5× interquartile range (whiskers) and outliers (circles). The p-values on the graph indicate either parametric or non-parametric two-sample tests ( $n = 22$ ). Error bars show standard error.

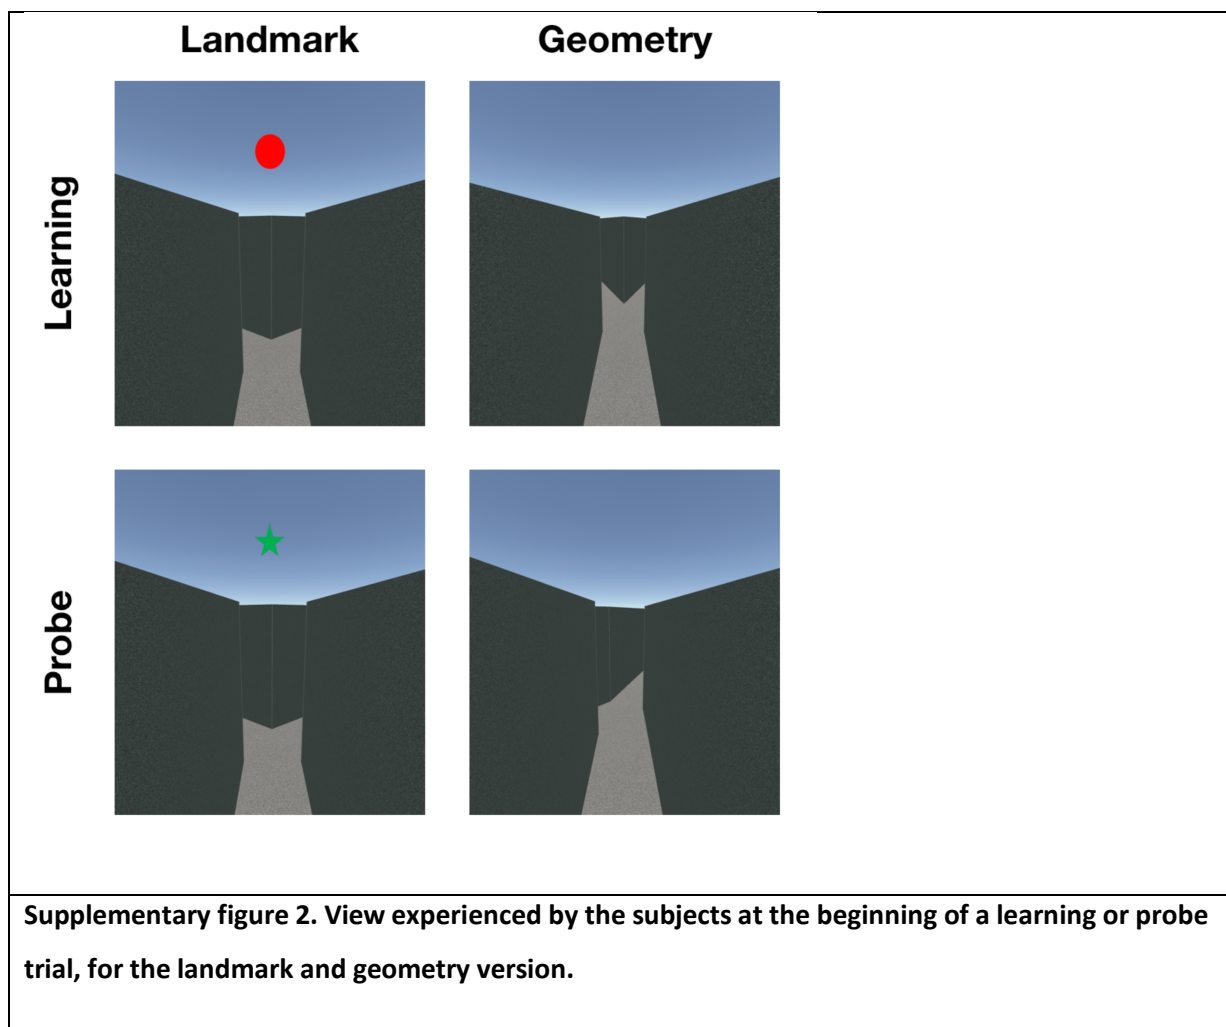

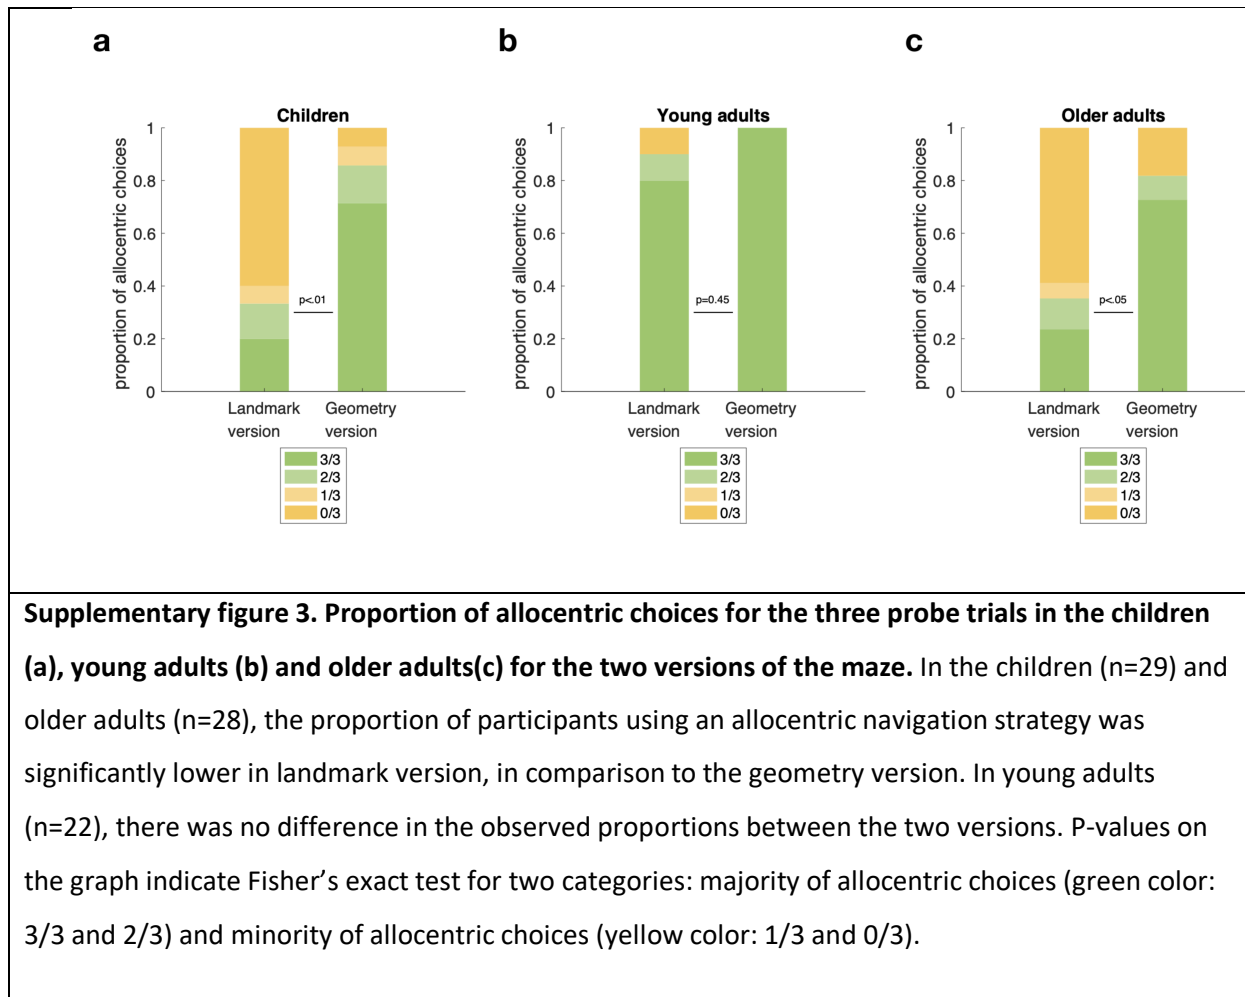

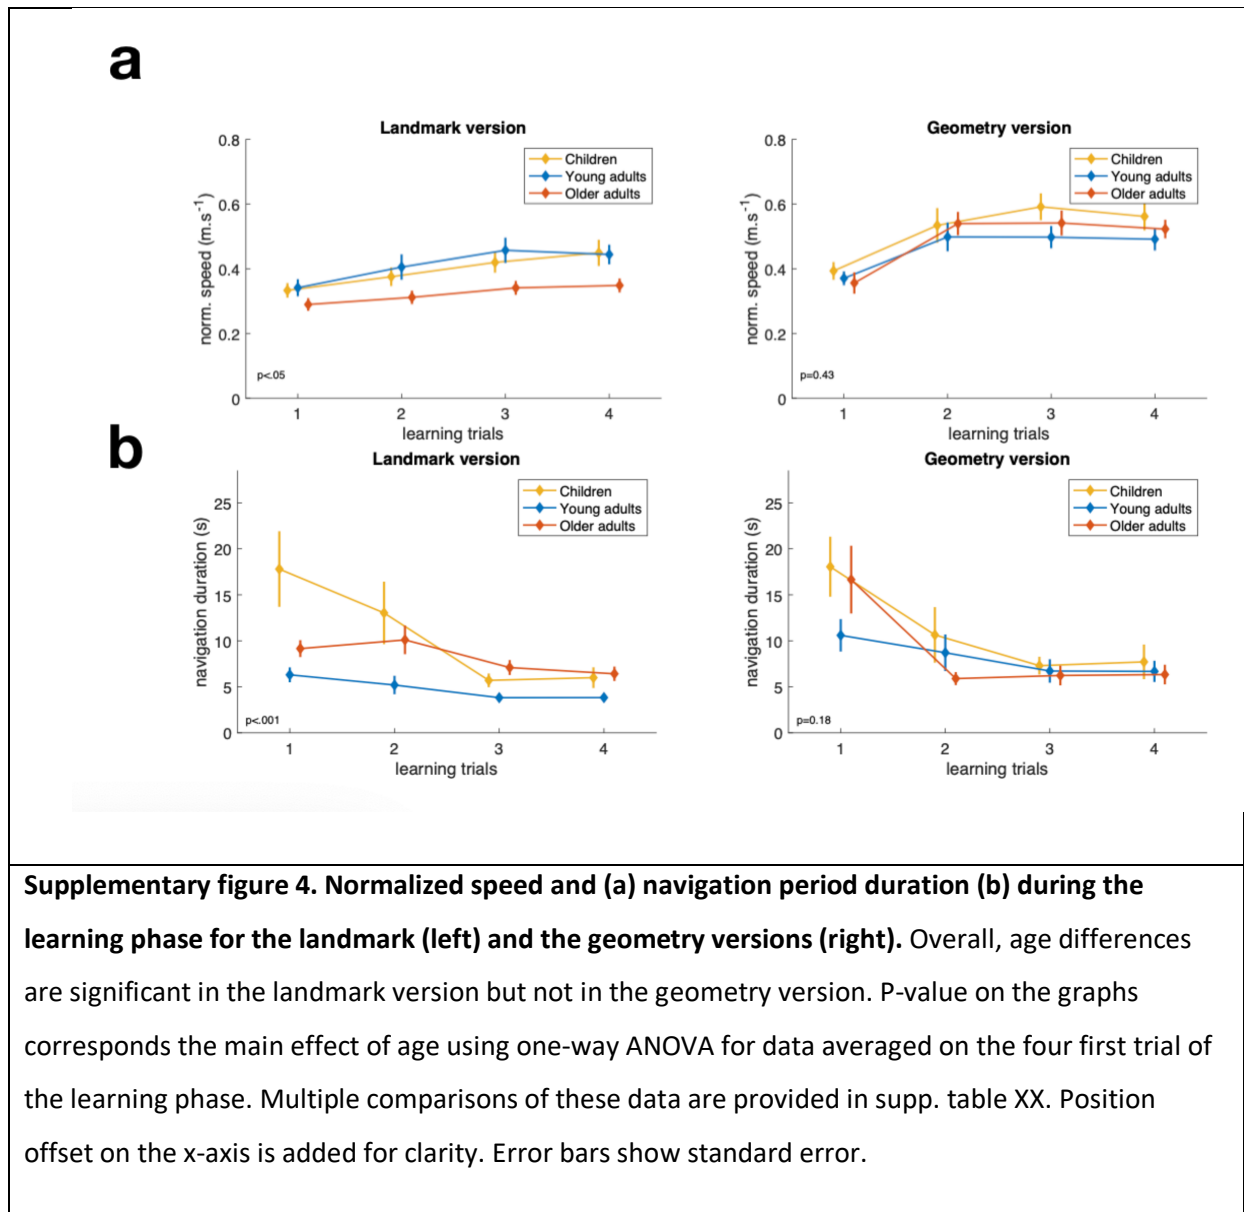



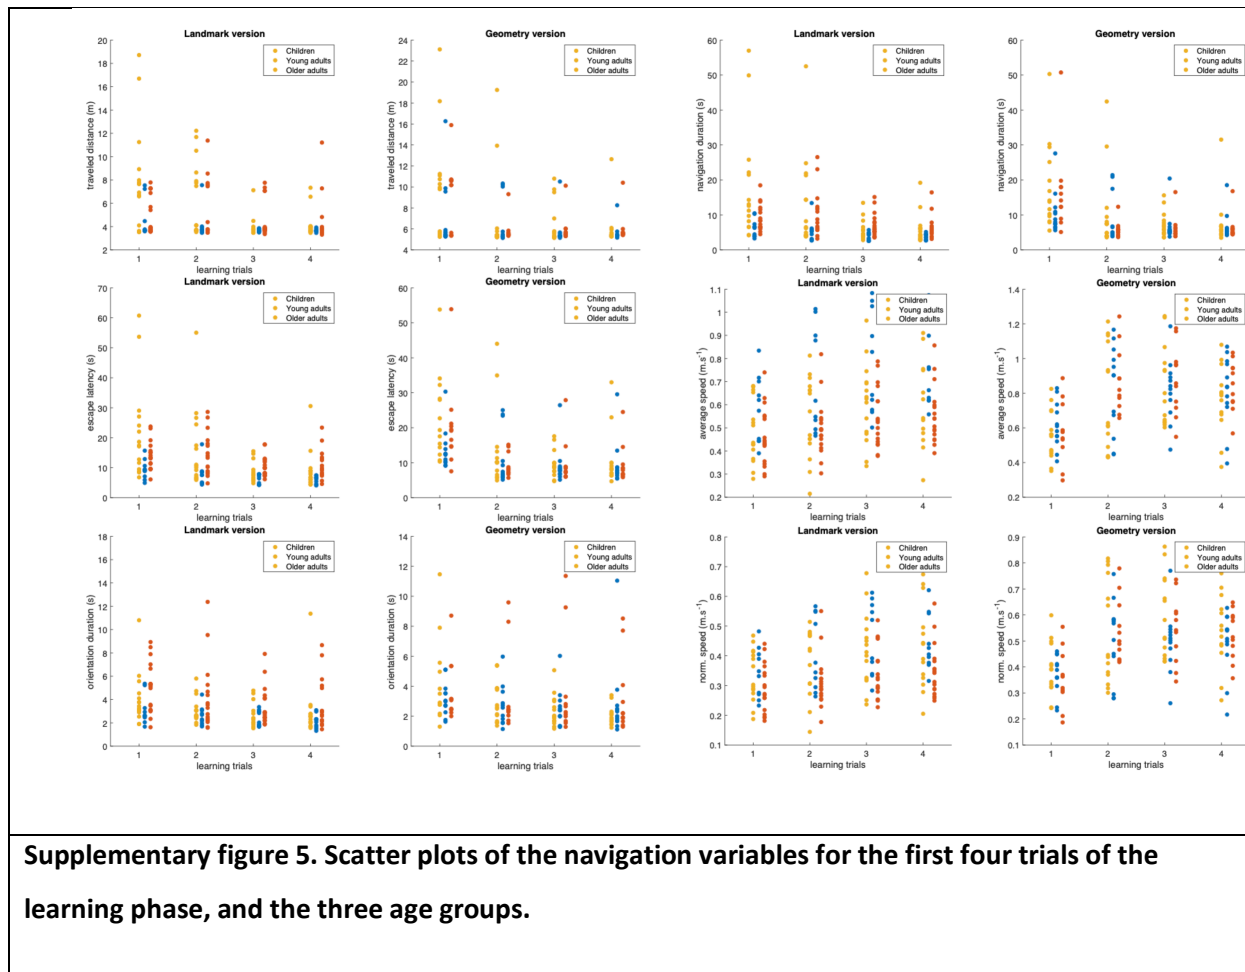

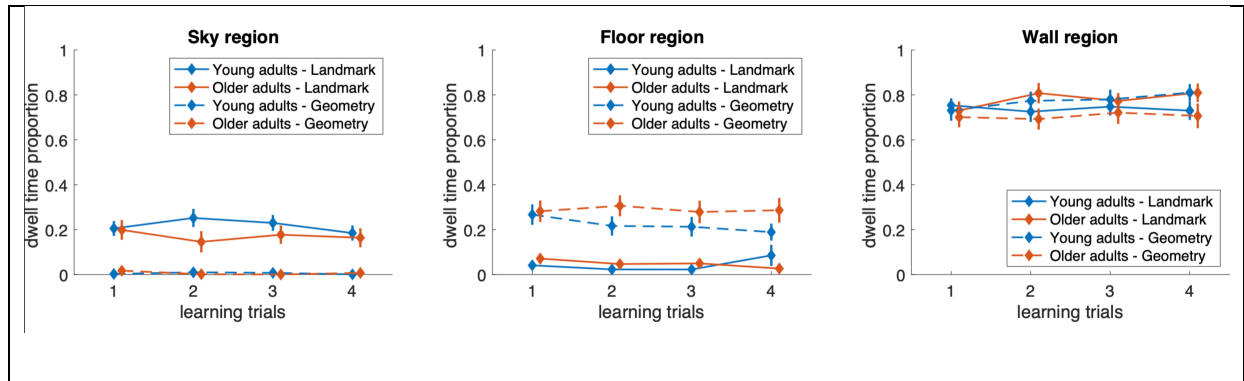

**Supplementary figure 6. Dwell time proportion for 3 areas of interest: sky, floor and wall regions, for the four first trials of the learning phase.** Participants in the landmark version spent significantly more time gazing to the sky region (particularly the circle landmark) whereas participants in the geometry version spent more time gazing to the floor (particularly the crotch region), independently of age. Position offset on the x-axis is added for clarity. Error bars show standard error.

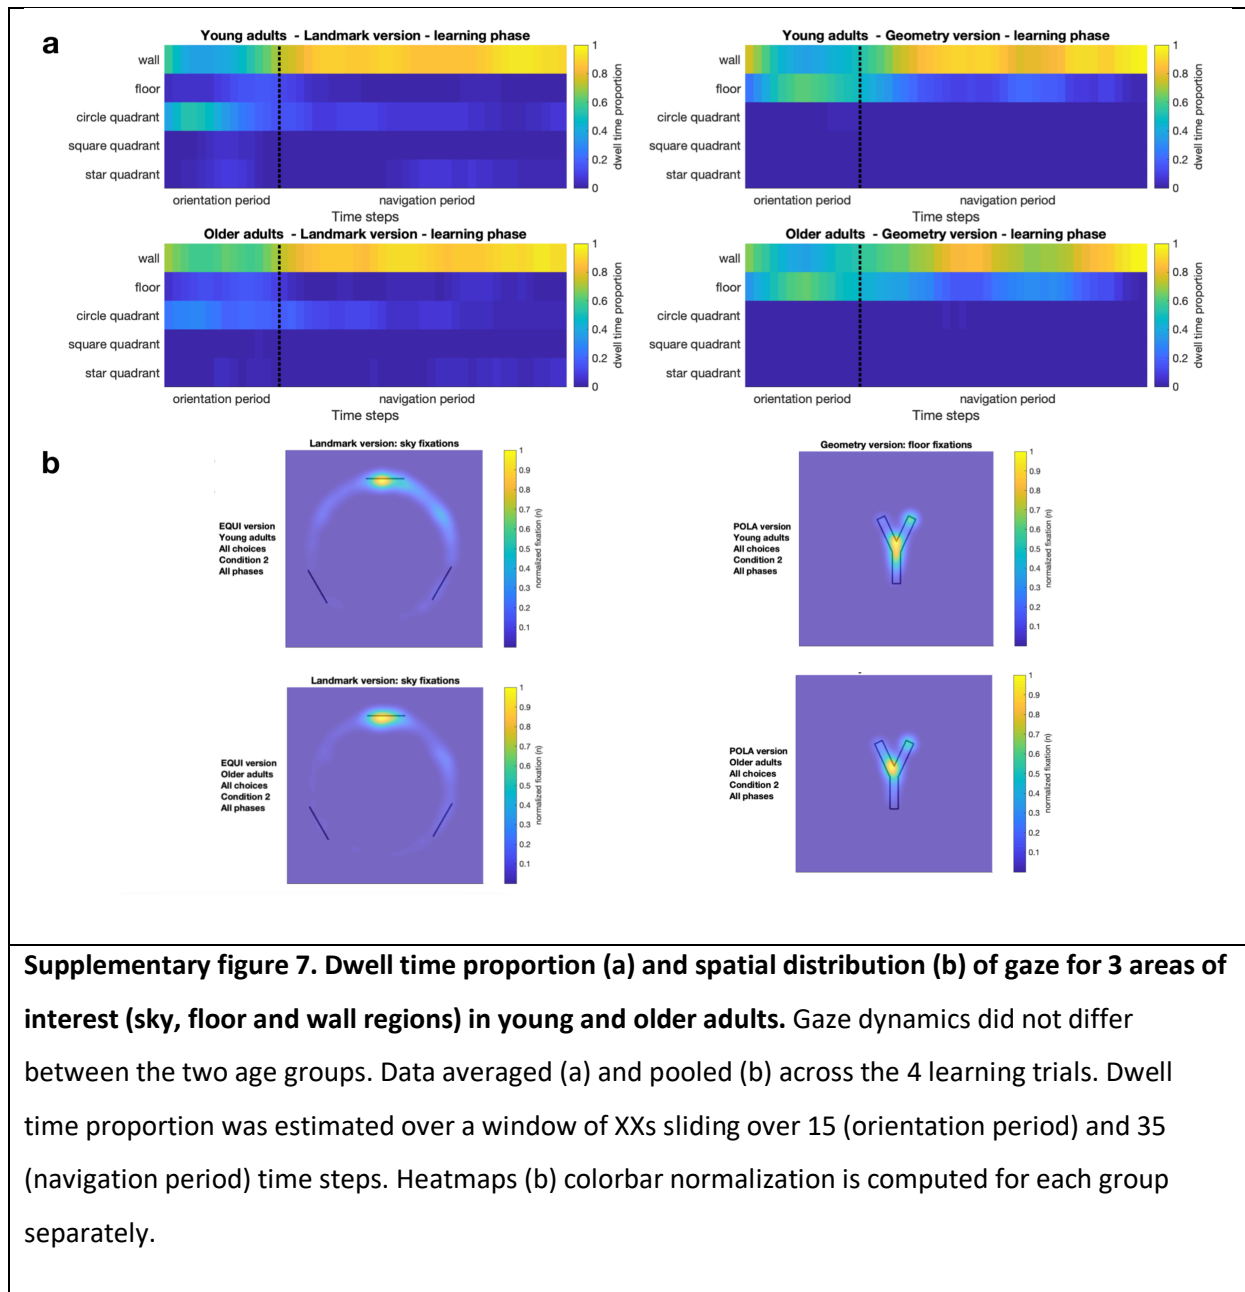

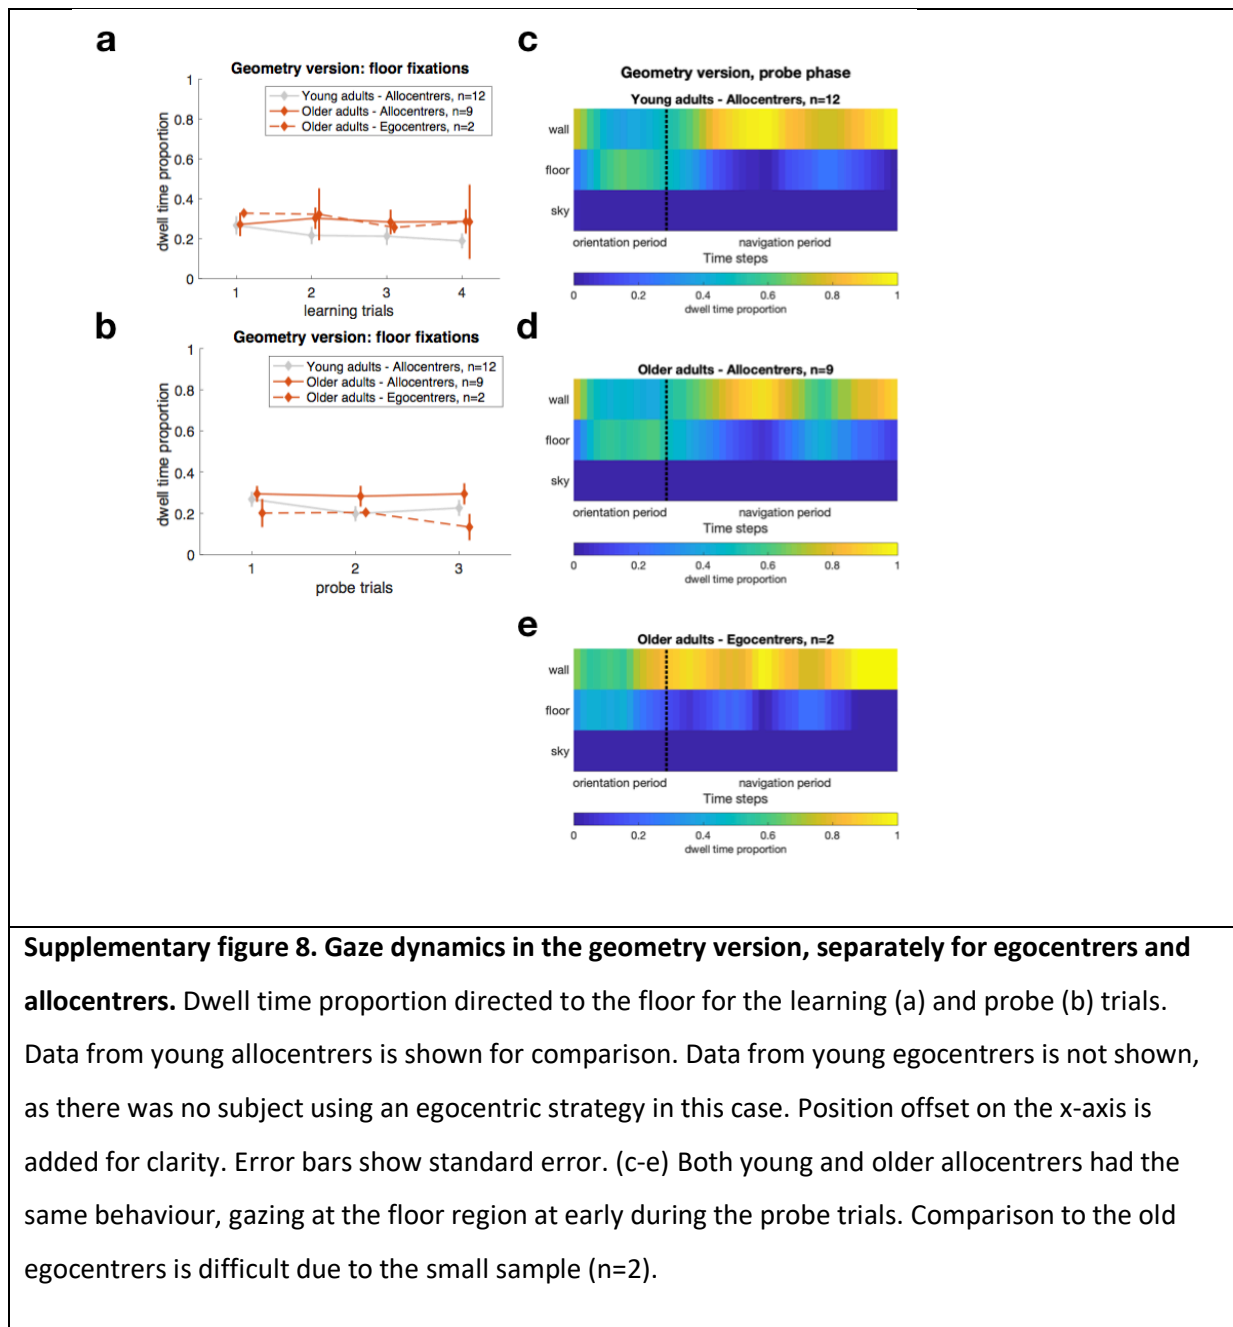

**Supplementary figure 8. Gaze dynamics in the geometry version, separately for egocenters and allocenters.** Dwell time proportion directed to the floor for the learning (a) and probe (b) trials. Data from young allocenters is shown for comparison. Data from young egocenters is not shown, as there was no subject using an egocentric strategy in this case. Position offset on the x-axis is added for clarity. Error bars show standard error. (c-e) Both young and older allocenters had the same behaviour, gazing at the floor region at early during the probe trials. Comparison to the old egocenters is difficult due to the small sample (n=2).

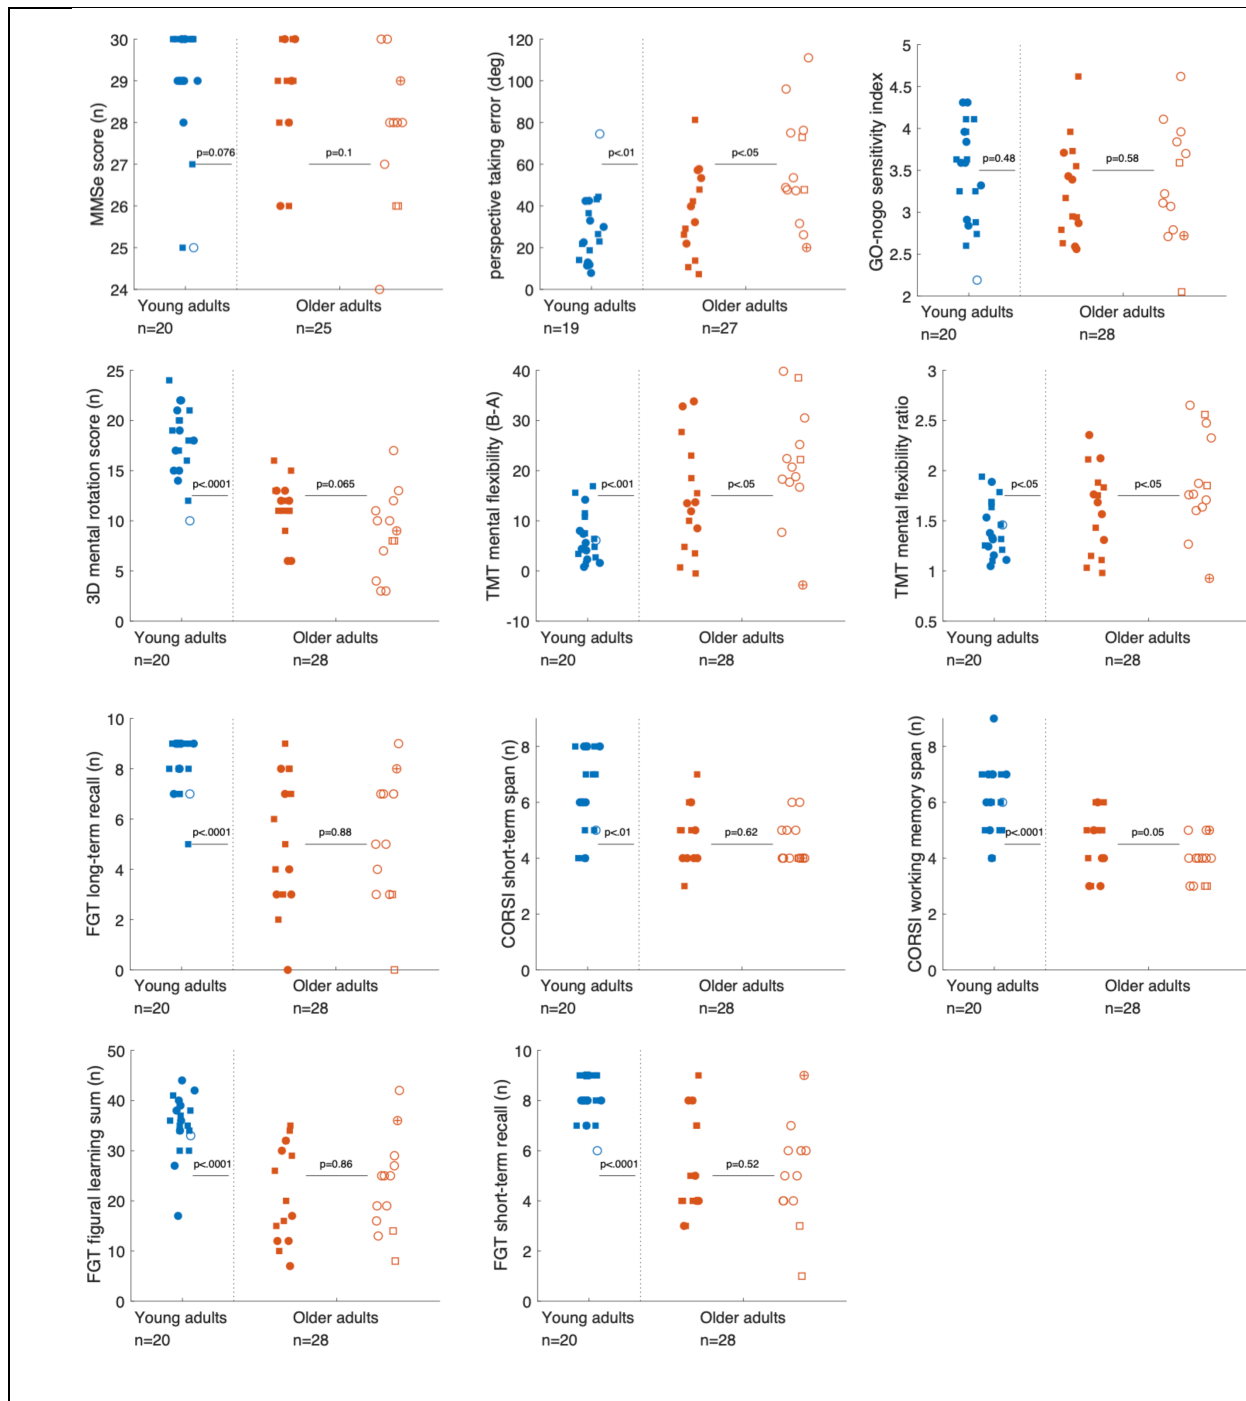

**Supplementary figure 9. Cognitive functions in the adult participants.** The P-value on the left side of the each corresponds to comparison of the “Age effect” (young vs. older adults, pooled across the two versions), whereas the P-value on the right indicates the “Choice effect” (allocenters vs. egocenters, in the old group). When the variable was continuous and normality of the data was reached, we used t-test. Otherwise, we used Wilcoxon rank sum test when the variable was ordinal. The size of the sample may differ between the analyses presented here. This is due to the fact that not all participants performed all the screening tests of the cohort. An offset is added to the x-axis for clarity. MMSe: mini mental state examination; TMT: trail-making test.

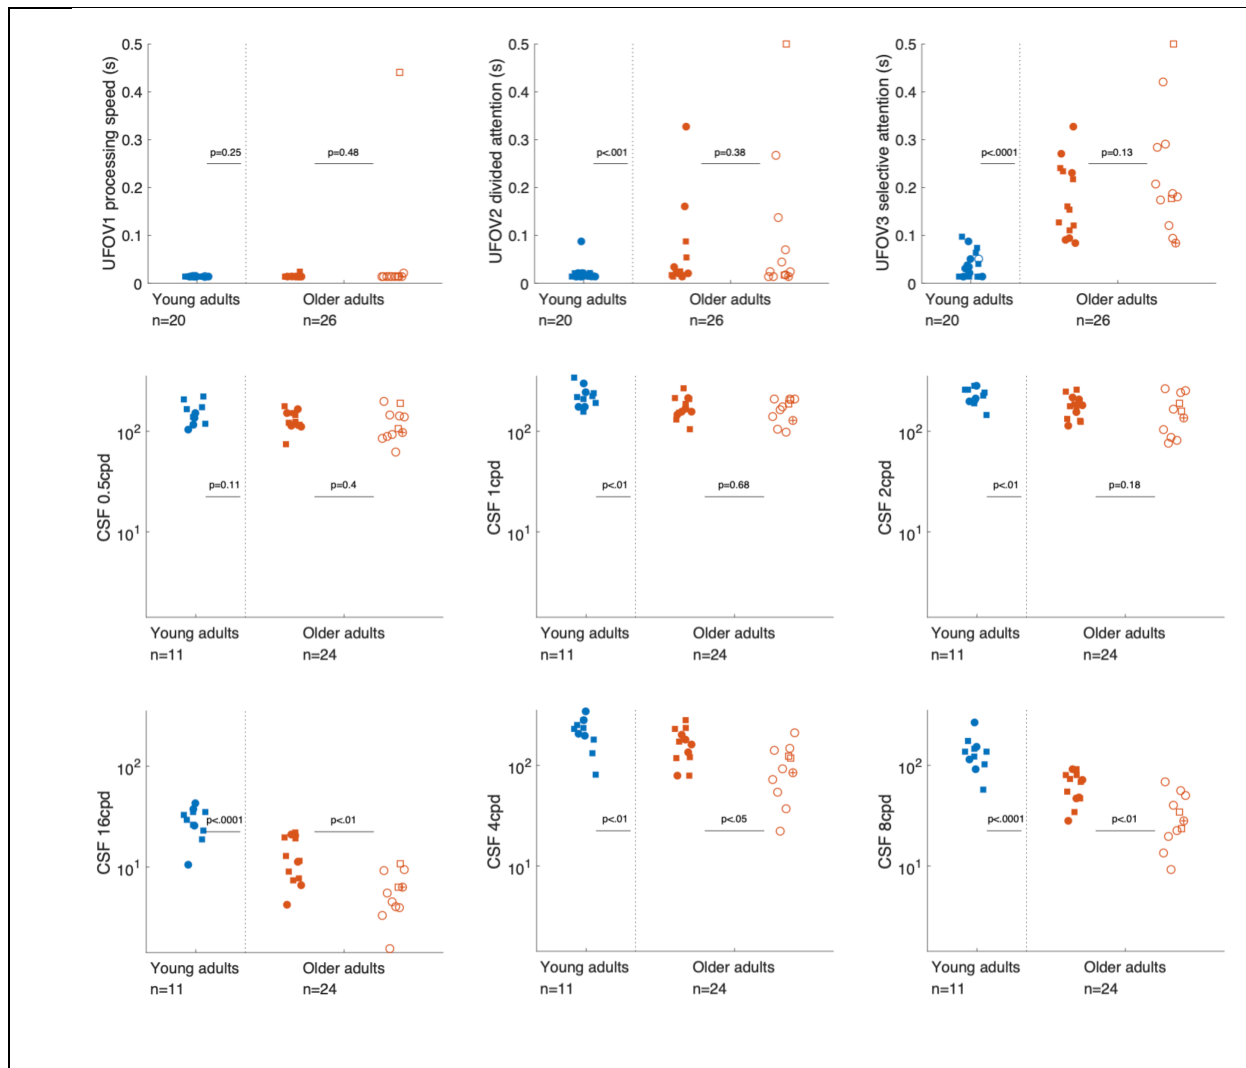

**Supplementary figure 10. Visual functions in the adult participants.** The P-value on the left side of the each corresponds to comparison of the “Age effect” (young vs. older adults, pooled across the two versions), whereas the P-value on the right indicates the “Choice effect” (allocentrers vs. egocentrers, in the old group). When the variable was continuous and normality of the data was reached, we used t-test. Otherwise, we used non-parametric Wilcoxon rank sum test when the variable was ordinal. The size of the sample may differ between the analyses presented here. This is due to the fact that not all participants performed all the screening tests of the cohort. An offset is added to the x-axis for clarity. UFOV: useful field of view; CSF: contrast sensitivity function; CPD: circles per degree.

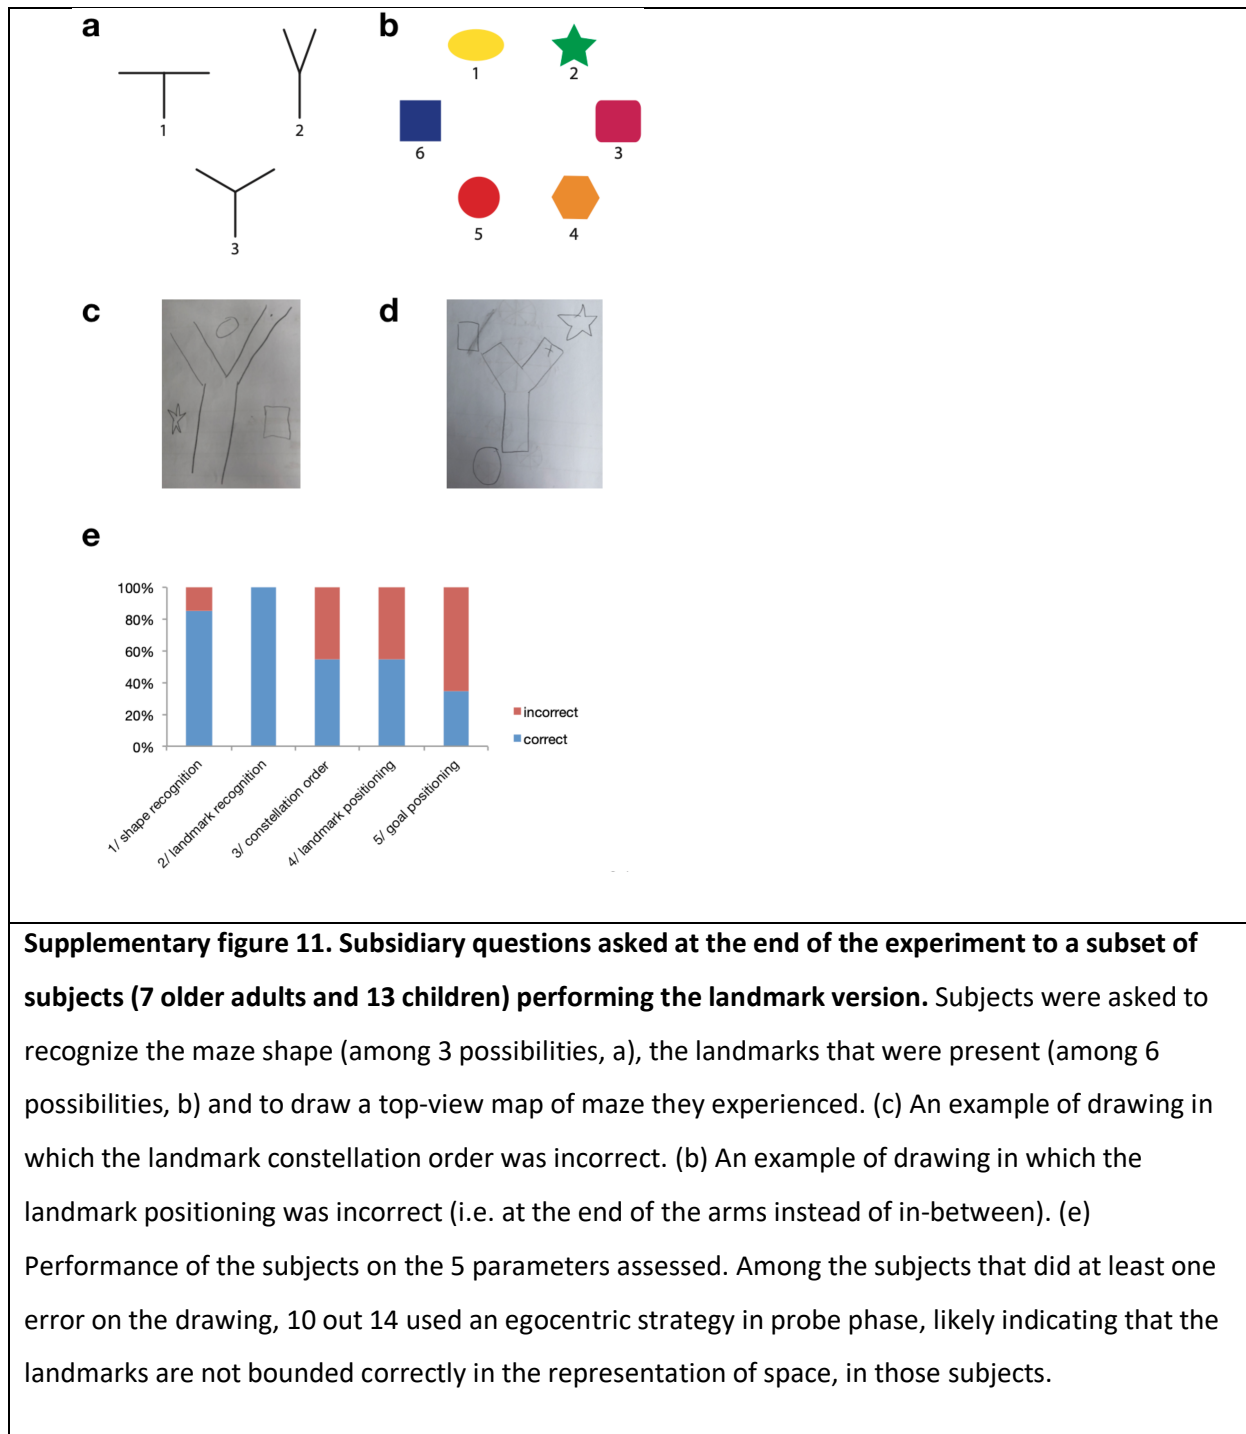



## Supplementary tables

### Supplementary table 1.

**Number of observations, mean and standard deviation of age in subgroups.** Allocenters, egocenters and returners are categories defined by the performance on the probe trials. For instance, a subject who had a majority of allocentric choices (2/3 or more) is categorized as an allocentrier.

|                         |             | Children |                       | Young adults |                       | Older adults |                       |
|-------------------------|-------------|----------|-----------------------|--------------|-----------------------|--------------|-----------------------|
|                         |             | n        | mean age ( $\pm$ std) | n            | mean age ( $\pm$ std) | n            | mean age ( $\pm$ std) |
| <b>Landmark version</b> | allocenters | 5        | 10.40 ( $\pm$ 0.55)   | 9            | 28.00 ( $\pm$ 5.35)   | 6            | 72.67 ( $\pm$ 5.43)   |
|                         | egocenters  | 9        | 10.56 ( $\pm$ 0.53)   | 1            | 25                    | 10           | 73.00 ( $\pm$ 3.16)   |
|                         | returners   | 1        | 10                    | 0            |                       | 1            | 76                    |
|                         | total       | 15       | 10.46 ( $\pm$ 0.52)   | 10           | 27.7 ( $\pm$ 5.14)    | 17           | 73.06 ( $\pm$ 3.93)   |
| <b>Geometry version</b> | allocenters | 12       | 10.33 ( $\pm$ 0.49)   | 12           | 28.08 ( $\pm$ 3.65)   | 9            | 73.33 ( $\pm$ 4.53)   |
|                         | egocenters  | 2        | 10.00 ( $\pm$ 0)      | 0            |                       | 2            | 72.50 ( $\pm$ 0.70)   |
|                         | returners   | 0        |                       | 0            |                       | 0            |                       |
|                         | total       | 14       | 10.29 ( $\pm$ 0.47)   | 12           | 28.08 ( $\pm$ 3.65)   | 11           | 73.18 ( $\pm$ 4.07)   |

## Supplementary table 2.

**Multiple comparison of one-way ANOVA on navigation data, averaged over the first four trials of the learning phase.** Tukey's honest significant difference criterion is applied. CI: confidence interval of the estimate.

|                             | group 1      | group 2      | lower CI | estimate | upper CI | p-value |                            | group 1      | group 2      | lower CI | estimate | upper CI | p-value |
|-----------------------------|--------------|--------------|----------|----------|----------|---------|----------------------------|--------------|--------------|----------|----------|----------|---------|
| <b>travelled distance</b>   | children     | young adults | 0,01     | 0,03     | 0,05     | 0,005   | <b>navigation duration</b> | children     | young adults | 0,09     | 0,24     | 0,39     | 0,001   |
|                             | children     | older adults | -0,01    | 0,01     | 0,03     | 0,380   |                            | children     | older adults | -0,12    | 0,01     | 0,14     | 0,960   |
|                             | young adults | older adults | -0,04    | -0,02    | 0,00     | 0,080   |                            | young adults | older adults | -0,37    | -0,23    | -0,08    | 0,002   |
| <b>escape latency</b>       | children     | young adults | 0,07     | 0,20     | 0,33     | 0,002   | <b>average speed</b>       | children     | young adults | -0,48    | -0,22    | 0,03     | 0,099   |
|                             | children     | older adults | -0,12    | -0,01    | 0,10     | 0,988   |                            | children     | older adults | -0,13    | 0,09     | 0,31     | 0,590   |
|                             | young adults | older adults | -0,33    | -0,21    | -0,08    | 0,001   |                            | young adults | older adults | 0,06     | 0,31     | 0,56     | 0,011   |
| <b>orientation duration</b> | children     | young adults | -0,06    | 0,10     | 0,26     | 0,313   | <b>normalized speed</b>    | children     | young adults | -0,28    | -0,05    | 0,19     | 0,870   |
|                             | children     | older adults | -0,21    | -0,07    | 0,07     | 0,413   |                            | children     | older adults | -0,02    | 0,18     | 0,38     | 0,091   |
|                             | young adults | older adults | -0,32    | -0,17    | -0,01    | 0,030   |                            | young adults | older adults | 0,00     | 0,23     | 0,46     | 0,050   |

### Supplementary table 3.

**Multiple comparison of two-way ANOVA on time-related navigation variables, averaged over the probe trials.** Tukey's honest significant difference procedure is applied. CI : confidence interval of the estimate.

|                                  | <b>group 1</b> | <b>group 2</b> | <b>lower CI</b> | <b>estimate</b> | <b>upper CI</b> | <b>p-value</b> |
|----------------------------------|----------------|----------------|-----------------|-----------------|-----------------|----------------|
| <b>normalized escape latency</b> | Y-L            | O-L            | -0.29           | -0.16           | -0.04           | <0.01          |
|                                  | Y-L            | Y-G            | 0.02            | 0.12            | 0.23            | <0.05          |
|                                  | Y-L            | O-G            | -0.03           | 0.08            | 0.19            | 0.20           |
|                                  | O-L            | Y-G            | 0.17            | 0.29            | 0.41            | <0.001         |
|                                  | O-L            | O-G            | 0.12            | 0.25            | 0.37            | <0.001         |
|                                  | Y-G            | O-G            | -0.15           | -0.04           | 0.06            | 0.70           |
|                                  | <b>group 1</b> | <b>group 2</b> | <b>lower CI</b> | <b>estimate</b> | <b>upper CI</b> | <b>p-value</b> |
| <b>time in central are</b>       | Y-L            | O-L            | -0.23           | -0.14           | -0.05           | <0.001         |
|                                  | Y-L            | Y-G            | -0.08           | -0.01           | 0.06            | 0.97           |
|                                  | Y-L            | O-G            | -0.10           | -0.03           | 0.05            | 0.80           |
|                                  | O-L            | Y-G            | 0.04            | 0.13            | 0.21            | <0.01          |
|                                  | O-L            | O-G            | 0.03            | 0.11            | 0.20            | <0.01          |
|                                  | Y-G            | O-G            | -0.09           | -0.01           | 0.06            | 0.95           |
|                                  | <b>group 1</b> | <b>group 2</b> | <b>lower CI</b> | <b>estimate</b> | <b>upper CI</b> | <b>p-value</b> |
| <b>orientation duration</b>      | Y-L            | O-L            | -0.57           | -0.34           | -0.11           | <0.01          |
|                                  | Y-L            | Y-G            | -0.19           | 0.00            | 0.19            | 1              |
|                                  | Y-L            | O-G            | -0.25           | -0.05           | 0.16            | 0.92           |
|                                  | O-L            | Y-G            | 0.12            | 0.34            | 0.56            | <0.01          |
|                                  | O-L            | O-G            | 0.06            | 0.29            | 0.52            | <0.01          |
|                                  | Y-G            | O-G            | -0.24           | -0.05           | 0.15            | 0.91           |

## Supplementary Table 4.

| <b>List of visual and cognitive tests performed by a subset of our adult participants</b> |                          |                                                                                                                                                                                                                                                                       |
|-------------------------------------------------------------------------------------------|--------------------------|-----------------------------------------------------------------------------------------------------------------------------------------------------------------------------------------------------------------------------------------------------------------------|
|                                                                                           | <b>Assessed function</b> | <b>Test/apparatus, task description and units of measurement</b>                                                                                                                                                                                                      |
| <b>Visual screening</b>                                                                   | Contrast sensitivity     | Evaluating sensitivity thresholds for different spatial frequencies (0.5, 1, 2, 4, 8, 16 circles per degree) in photopic condition, with subjects' own optical correction                                                                                             |
|                                                                                           | Visual attention         | Useful Field of View: central (UFOV1), central+peripheral visual discrimination task, without (UFOV2) and with (UFOV3) visual distractors, with subjects' own optical correction. Expressed in second needed for a correct discrimination (UFOV, Ball & Owsley, 1993) |
| <b>Cognitive screening</b>                                                                | Composite                | Mini Mental State Examination (MMSE, Folstein, Folstein, & McHugh, 1975). Expressed as a score representing items succeeded.                                                                                                                                          |
|                                                                                           | Spatial working memory   | Corsi block-tapping test: recalling spatial sequence of cubes in the forward (short-term span) or backward (working memory span) order (Schuhfried, 2004). Expressed as the largest sequence succeeded.                                                               |
|                                                                                           | Visual memory            | Figural Memory test: learning 9 visual figures presented 5 times and recalling them after 5 and 20 minutes (Schuhfried, 2004). Expressed as number of figures learned correctly (sum up to 45 items) or recalled (up to 9 items)                                      |
|                                                                                           | Mental rotation          | 3D mental rotation test: mentally imaging views around 3D cubes (Schuhfried, 2004). Expressed as a number of correct items (up to 30)                                                                                                                                 |
|                                                                                           | Perspective taking       | Perspective Taking/Spatial Orientation test: imagining position and facing direction relative to a two-dimensional array of objects and indicating the position of a third object (Hegarty & Waller, 2004). Expressed as an error in degree                           |
|                                                                                           | Mental flexibility       | Trail Making test: following sequences of letters (part A) and alternating between letters and numbers (B). Expressed as a difference between time needed in B and A (Schuhfried, 2004)                                                                               |
|                                                                                           | Inhibition capacity      | Go/no go task: responding to a frequent stimulus while inhibiting response to a rare one (Schuhfried, 2004). Expressed as a sensitivity index: $z(\text{hits}) - z(\text{false alarm})$                                                                               |

## Supplementary Table 5.

| <b>Inclusion/exclusion criteria used for the SilverSight cohort (adult participants only).</b> |                                                                                                                                                                                                                                                                                                                                                                                                                                                                                                                                                                                                                                                                                                                                                                                                                                                                                                                                                                                                                                                                                   |
|------------------------------------------------------------------------------------------------|-----------------------------------------------------------------------------------------------------------------------------------------------------------------------------------------------------------------------------------------------------------------------------------------------------------------------------------------------------------------------------------------------------------------------------------------------------------------------------------------------------------------------------------------------------------------------------------------------------------------------------------------------------------------------------------------------------------------------------------------------------------------------------------------------------------------------------------------------------------------------------------------------------------------------------------------------------------------------------------------------------------------------------------------------------------------------------------|
| <b>Inclusion criteria</b>                                                                      | <ul style="list-style-type: none"><li>- Volunteer: man or woman</li><li>- Aged over 18 years old</li><li>- Affiliated to the social security system</li><li>- Absence of pathology, deficit or disorder that can interfere with visual, auditory, vestibular or cognitive functions</li></ul>                                                                                                                                                                                                                                                                                                                                                                                                                                                                                                                                                                                                                                                                                                                                                                                     |
| <b>Exclusion criteria</b>                                                                      | <ul style="list-style-type: none"><li>- Person under guardianship</li><li>- Person using walker or wheelchair</li><li>- Person with a history of stroke</li><li>- Person with a history of epilepsy or convulsions</li><li>- Person with an history of active or progressive ophtalmological pathology to the exception of cataract</li><li>- Person with an history of active or progressive otological pathology or a surgical treatment (cholesteatoma, neuroma, otosclerosis)</li><li>- Best corrected visual acuity at 100% contrast lower than 7/10 or 5/10 before or after 70 yo, respectively, in one or both eyes</li><li>- Presence of abnormality on the monocular or binocular field of view</li><li>- Impaired color vision for one or both eyes on the D15 desaturated Lanthony test (protanope, deuteranope or tritanope)</li><li>- Ascending audiometric curve for one or both ears</li><li>- Balance disorders</li><li>- Minimal Mental State exam score lower than 24</li><li>- General Health Questionnaire score higher than 4 for depressive items</li></ul> |

## ***Supplementary References***

Ball, K. & Owsley, C. The useful field of view test: a new technique for evaluating age- related declines in visual function. *J Am. Optom. Assoc.* **64**, 71–79 (1993).

Folstein, M. F., Folstein, S. E. & McHugh, P. R. Mini-Mental State: A practice method for grading the cognitive state of patients for the clinician. *J Psychiatr Res* **12**, 189–198 (1975).

Schuhfried, G. Vienna test system (WTS). (2004).

Hegarty, M. & Waller, D. A dissociation between mental rotation and perspective-taking abilities. *Intelligence* **32**, 175–191 (2004).

Tinetti, M. E., Richman, D. & Powell, L. Falls efficacy as a measure of fear of falling. *J. Gerontol.* **45**, P239–P243 (1990).

Goldberg, D. P. & Hillier, V. F. A scaled version of the General Health Questionnaire. *Psychol. Med.* **9**, 139–145 (1979).
